1  
2  
3  
4  
5

6 **An automated homecage system for multiwhisker detection**  
7 **and discrimination learning in mice**  
8

9  
10  
11  
12  
13  
14  
15

16 Sarah M. Bernhard<sup>1</sup>, Jiseok Lee<sup>2</sup>, Mo Zhu<sup>2</sup>, Alex Hsu<sup>2</sup>, Andrew Erskine<sup>3</sup>, Samuel A. Hires<sup>3</sup>,  
17 Alison L. Barth<sup>2\*</sup>  
18

19  
20

21 Address:

22 <sup>1</sup>Department of Psychology, Carnegie Mellon University, Pittsburgh, PA, United States of  
23 America  
24

25 <sup>2</sup>Department of Biological Sciences, Carnegie Mellon University, Pittsburgh, PA, United States  
26 of America  
27

28 <sup>3</sup>Department of Biological Sciences, Section of Neurobiology, University of Southern California,  
29 Los Angeles, CA, United States of America  
30

31 \*Corresponding author

32 Email: [albarth@andrew.cmu.edu](mailto:albarth@andrew.cmu.edu) (ALB)  
33

## 35 **Abstract**

36 Automated, homecage behavioral training for rodents has many advantages: it is low  
37 stress, requires little interaction with the experimenter, and can be easily manipulated to adapt  
38 to different experimental condition. We have developed an inexpensive, Arduino-based,  
39 homecage training apparatus for sensory association training in freely-moving mice using  
40 multiwhisker air current stimulation coupled to a water reward. Animals learn this task readily,  
41 within 1-2 days of training, and performance progressively improves with training. We examined  
42 the parameters that regulate task acquisition using different stimulus intensities, directions, and  
43 reward valence. Learning was assessed by comparing anticipatory licking for the stimulus  
44 compared to the no-stimulus (blank) trials. At high stimulus intensities (>9 psi), animals showed  
45 markedly less participation in the task. Conversely, very weak air current intensities (1-2 psi)  
46 were not sufficient to generate rapid learning behavior. At intermediate stimulus intensities (5-6  
47 psi), a majority of mice learned that the multiwhisker stimulus predicted the water reward after  
48 24-48 hrs of training. Both exposure to isoflurane and lack of whiskers decreased animals'  
49 ability to learn the task. Perceptual learning was assessed and following training at an  
50 intermediate stimulus intensity, perception was likely heightened as mice were able to transfer  
51 learning behavior when exposed to the lower stimulus intensity. Mice learned to discriminate  
52 between two directions of stimulation rapidly and accurately, even when the angular distance  
53 between the stimuli was <15 degrees. Switching the reward to a more desirable reward,  
54 aspartame, had little effect on learning trajectory. Our results show that a tactile association task  
55 in an automated homecage environment can be monitored by anticipatory licking to reveal rapid  
56 and progressive behavioral change. These Arduino-based, automated mouse cages enable  
57 high-throughput training that facilitate analysis of large numbers of genetically modified mice  
58 with targeted manipulations of neural activity.

59

## 60 Introduction

61 The whisker system has been extensively used in mice and rats to study the  
62 organization and response properties of neurons in the somatosensory system. The barrel  
63 cortex, a precise somatotopic map of identified facial vibrissae in the neocortex, facilitates the  
64 targeted analysis of whisker-dependent stimulus response properties and experience-  
65 dependent plasticity. Stimulation of a single whisker has been used to map receptive field  
66 properties of cortical neurons (1,2), as well as drive experience-dependent plasticity (3–  
67 6). Indeed, with intensive training, mice and rats can use a single whisker to detect object  
68 location (1,7,8), indicating that individual whisker activation can be behaviorally meaningful.

69 Because the whiskers are typically used together during normal sensory activation,  
70 multiwhisker stimulation has increasingly been used to study the response transformations and  
71 plasticity of cortical neurons (9–11). New studies show that multiwhisker stimuli can potently  
72 activate cortical neurons in ways that were not predicted by single-whisker stimuli (10,12). In  
73 addition, vibrissae can be used not only for active sensation, reflected in whisking behavior that  
74 often accompanies exploration of novel objects, but also for detection of low-frequency input  
75 from the environment. For example, harbor seals can track a decoy through water by tracking  
76 alterations in local currents, a task that is whisker-dependent (13).

77 Because multiwhisker stimuli are an ethologically appropriate way to activate the facial  
78 vibrissae, we reasoned that these stimuli might be an excellent probe to investigate learning and  
79 plasticity in mice. Indeed, we have recently shown that multiwhisker stimuli are readily detected  
80 by mice and can be used in a sensory learning task that drives plasticity in cortical circuits (11).  
81 Here we sought to determine how multiwhisker stimuli, delivered through a gentle air current  
82 directed at the large facial vibrissae of mice, could be used to drive learning behavior in an  
83 automated sensory association task. These stimuli are quantitatively different from those used  
84 as punishment in other investigations which use airpuff intensities that are 5-100x greater than

85 those deployed in our studies and are often directed toward the animal's face or eye. In  
86 contrast, the stimuli used here were of low intensity and specifically targeted at the distal ends  
87 of the large facial vibrissae.

88 We examined the parameters required for mice to learn how to detect and discriminate  
89 multiwhisker deflections caused by an air current directed to the large vibrissae. Establishing  
90 this stimulus training paradigm in rodents would be useful for neurobiological studies, as it can  
91 be adapted to homecage training in freely-moving animals and is well-suited for cellular analysis  
92 of cortical circuits, since the anatomical region corresponding to the stimulated whiskers is  
93 broad and experimental analysis does not need to be targeted to a single barrel  
94 column. Furthermore, automation of the behavioral set up allows for an increase in throughput,  
95 with minimal interaction with the experimenter and less variability in training conditions. Our  
96 results show that mice rapidly learn to associate a multiwhisker stimulus with a reward, that they  
97 show an exquisite sensitivity to discriminate different directions of stimulation, and that sensory  
98 association training (SAT) reduces perceptual thresholds for stimulus detection.

99

## 100 **Materials and methods**

### 101 **Animals**

102 Behavioral data was collected from 131 C57/BL6 mice (Harlan Laboratories); ages  
103 ranged from postnatal day 22 (P22) – P28. Mice were housed individually during training.  
104 Animals were exposed to a 12-hour light-dark cycle schedule with lights on at 7am and had free  
105 access to food and water, the only source of which was dispensed from a recessed lickport in  
106 the custom-built chamber. Animals were given at least 24 hours to acclimate to the cage before  
107 SAT, during which there was no sensory stimulus coupled to water delivery. Approximately 1-3

108 ml of water was dispensed each day. All experiments conducted were approved by Carnegie  
109 Mellon University Animal Care and Use Committee.

110

## 111 **Stimulus calibration**

112 Throughout SAT, stimulus intensity was set to a constant level using a gas regulator  
113 (Fisherbrand). To ensure accurate calibration of stimulus intensity, a pressure transducer (NXP  
114 USA Inc.) was used to provide an exact measurement of pressure at the opening of the air  
115 tube. Actual air pressure at the whiskers was lower than at the air tube opening, located ~4 cm  
116 above the whiskers (Fig 1), and because animals self-positioned at the nosepoke, it was not  
117 possible to determine small variations in the specific whiskers activated during training. Three  
118 different stimulus intensities were used in these studies: 1-2 psi (abbreviated as 2 psi), 5-6 psi  
119 (abbreviated as 6 psi), or 9 psi air puffs. We calculated that a 6 psi stimulus was equivalent to  
120 0.4 bar. Because 1 psi pressure intensity was difficult to control with a conventional gas  
121 regulator, a second miniature gas regulator (PneumaticPlus) was used in series. The same  
122 training paradigm for acclimation (24 hrs) and training days (48-72 hrs) was used for all stimulus  
123 intensities.

124

## 125 **Whisker movement analysis**

126 To calibrate evoked whisker movements, air current stimulation was delivered to an  
127 anaesthetized mouse mounted with an air nozzle ~4 cm above and to the right of the animal's  
128 whiskers. Whisker movement was video recorded while receiving air current stimuli at 1, 5, or 9  
129 psi. Stimuli were delivered 50 times for each intensity, every 3 seconds for 500 ms (Fig 1).  
130 Movement of the A3 whisker was tracked using a variant of DeepLabCut  
131 ((14), <https://github.com/RoboDoig/dlc-cloudml>) trained to identify the whisker tip position.

132 Displacement of the whisker was analyzed from the DeepLabCut model using a custom  
133 MATLAB script.

134

## 135 **Sensory Training Paradigm**

136 Automated homecage training chambers for singly-housed animals were custom-made  
137 at Carnegie Mellon University. They consisted of a standard 7x12" mouse cage with a custom-  
138 built 3x5" stimulus chamber attached that contained a recessed lick port, 1/16" in diameter,  
139 which was fixed 2 cm above the base of the chamber ((11); Fig 2). Air currents were delivered  
140 ~4 cm above and 2.5 cm to the right of the recessed lick port, to ensure that they were directed  
141 at the distal tips of the whiskers. The infrared (IR) beam (Adafruit; Table 1) was also recessed  
142 and located approximately 1 cm in front of the lick port to signify whether a nose poke had  
143 occurred. To record licking behavior, a capacitive touch sensor (Adafruit; Table 1) was attached  
144 to the metallic lick port and a lick was recorded when the capacitance reached threshold. Data  
145 output from the lick sensor and IR beam was updated every 100 ms. Importantly, this design  
146 does not detect individual licks, which might occur  $\geq 10$  Hz. Furthermore, any licks that occurred  
147 at any point within the 100ms period were counted as one lick.

148

149 **Table 1. Key resources for behavioral chambers**

| Product name                                    | Company  | Product ID |
|-------------------------------------------------|----------|------------|
| Leonardo                                        | Arduino  | A000057    |
| Yún Shield v2.4                                 | Dragino  | N/A        |
| Relay Shield for Arduino v2.1                   | DFRobot  | DFR0144    |
| Standalone Momentary<br>Capacitive Touch Sensor | Adafruit | 1374       |

|                                  |                 |              |
|----------------------------------|-----------------|--------------|
| IR Break Beam Sensor             | Adafruit        | 2167         |
| Solenoid Valve                   | The Lee Company | LHDA1233115H |
| Gas regulator                    | Fisherbrand     | 10-575-105   |
| Miniature Air Pressure Regulator | PneumaticPlus   | PPR2-N02BG-2 |
| Pressure Transducer              | NXP USA Inc.    | MPX5100GP    |

150

151         Trials were self-initiated by an IR beam-break at the nosepoke entry port in the stimulus  
152 chamber (Fig 2). Once a trial started, there was a random delay ranging from 200-800 ms  
153 before stimulus delivery, to ensure that the sensory association would be made to the stimulus  
154 and not to the operant cue from the nosepoke. This random delay was followed by 500ms of the  
155 air puff stimulus. If the mouse was in the acclimation period, then no air puff would be delivered  
156 during this time. After a 500 ms break, water was delivered for 75 ms, equating to approximately  
157 15  $\mu$ L. There was a 925 ms break following water delivery, during which the next trial could not  
158 be initiated. A relay shield (DFRobot; Table 1) was used to activate solenoids (The Lee  
159 Company; Table 1) at precise times during the trial for both stimulus and water delivery. To  
160 disguise possible auditory cues promoted by the relay shield, non-stimulus trials activated  
161 separate relays that did not gate any air current.

162         An Arduino Leonardo was used to run and maintain the paradigm. The Yún Shield  
163 (Dragino; Table 1) connected the set up to the local Wi-Fi router and stored data collected from  
164 experiments. This device uploaded real time data to the internet for remote access.

165

## 166 **Isoflurane exposure**

167         For experiments to test the effects of inhalation anesthetics on sensory association  
168 learning, mice were exposed to isoflurane anesthesia in an enclosed glass jar for approximately

169 30-60 s until the hindlimb withdrawal reflex was absent. Anesthetic exposure occurred only once  
170 at midday prior to the first day of acclimation. Isoflurane-exposed animals were then housed in  
171 the training chamber for a 24 hr acclimation period followed by 48 hrs of sensory association  
172 training using a 6 psi airpuff stimulus.

173

## 174 **Whisker removal**

175 At some low incidence in standard animal housing, mice will spontaneously barber the  
176 whiskers of cagemates so that no large facial vibrissae remain; indeed, barbered animals  
177 typically have both fur and vibrissae removed. We took advantage of this natural behavior and  
178 used barbered mice to investigate whether whiskers were required for association learning in  
179 this automated set-up, without anesthetic confounds. Barbered mice were exposed to the  
180 sensory association task using a 6 psi airpuff stimulus as described above.

181

## 182 **Direction discrimination**

183 Discrimination learning was tested by using two different oriented air puffs with the same  
184 paradigm as described for sensory association training above, where 80% of trials used one  
185 direction and were coupled to the water reward and 20% of trials were at a different direction  
186 and were unrewarded. The two air puffs were delivered in a cylindrical association chamber with  
187 a central platform that the animal used to approach the nosepoke for trial initiation. Air tubes  
188 were oriented around this cylinder so that the delivery angle could be precisely controlled. The  
189 platform contained a cut out on the right side, in the location air puffs were delivered, to ensure  
190 that air puffs could be administered below the animal for upward deflection of the whiskers.

191 A second solenoid was used to deliver the unrewarded air puff. Unrewarded directional  
192 airpuffs (500 ms) were also delivered according to the same trials parameters as described



193 above: initiated by a nosepoke, with a random delay before presentation and no coupled water  
194 reward.

195

## 196 **Altered reward contingency**

197 Reward contingency could be digitally adjusted using the source code to alter stimulus-  
198 reward frequency. To determine whether reducing the frequency of reward trials would influence  
199 learning trajectories, the percentage of trials coupled to water was adjusted from 80% to 50% of  
200 initiated trials, and the remaining 50% of trials were blank trials. Airpuff intensities were set at 6  
201 psi and mice received the standard 24 hr acclimation and 48-72 hr training period.

202

## 203 **Perceptual learning air puff intensity during training**

204 Mice were exposed to the standard acclimation day and two days of 6 psi training.  
205 Following these two days of training at 6 psi, mice received another day of training with the air  
206 puff intensity decreased to 1 psi. Because the larger gas regulator is not as precise at producing  
207 air puffs with 1 psi intensity, the smaller gas regulator was used. A pressure transducer  
208 confirmed that the pressure was exact.

209

## 210 **Aspartame training**

211 To examine the effect of enhanced reward in SAT, we calibrated drinking preference to  
212 aspartame, sucralose, saccharine, and sucrose. Animals showed a modest preference for  
213 aspartame compared to other sweeteners and so this was used for subsequent experiments.  
214 When provided with either 10% aspartame or water as their sole source of hydration, mice  
215 showed a marked preference for aspartame; thus, we used aspartame in place of water to  
216 enhance reward valence. Animals were acclimated to the training cage with water provided

217 through the lickport. After acclimation, water was replaced with 10% aspartame and the same  
218 80%-stimulus/reward, 20% blank trial schedule was introduced. Anticipatory licking was  
219 calculated as described above. For aspartame-trained animals, aspartame solution  
220 consumption was modestly higher than in water-reward trials (~4.5 mls aspartame solution  
221 versus ~3 mls for water).

222

## 223 **Behavioral analysis**

224 Behavioral data obtained from experiments was analyzed using custom scripts in  
225 MATLAB (<https://github.com/barthlab/Sensory-association-training-behavior>). All licks times  
226 were adjusted to the beginning of the trial at air puff onset, following random delay. This  
227 readjustment was necessary to be able to compare lick times across trials with different random  
228 delay times. Licks were counted if they had taken place in the 700 – 1000 ms time window after  
229 the random delay, which was 300 ms directly before water delivery. Only these licks were  
230 analyzed to discriminate between anticipatory and consummatory licks. Anticipatory licks were  
231 separated based on stimulus and blank trials and binned into 4 hour intervals. The values were  
232 then converted into Hz. Performance was calculated by subtracting the lick rate of blank trials  
233 (Lick blank;  $L_b$ ) from water-rewarded trials (Lick water;  $L_w$ ) for each 4 hour time bin  
234 (performance= $L_w - L_b$ ). The last 20% of trials were analyzed and the lick rate for water trials was  
235 compared to blank trials. Behavior analysis was conducted for each animal and then averaged  
236 with other animals in the same experiment.

237

## 238 **Statistical analysis**

239 A Wilcoxin rank sum test was carried out to evaluate absolute differences in licking in  
240 stimulus ( $L_w$ ) versus blank ( $L_b$ ) for the last 20% of trials after 48 hrs of SAT for animals within an  
241 experimental group, to determine whether specific training conditions were sufficient to alter

242 behavior. The whisker-dependent sensory association behavioral paradigm developed here was  
243 easily adapted to a variety of different stimulus and reward conditions. Although in theory  
244 statistical comparisons could be made across experimental groups to identify optimal  
245 parameters for training, in practice wide variation in animal behavior during early learning - even  
246 within experimental groups- made it difficult to identify statistically significant differences.  
247 Despite the large number of animals in different test groups, experiments were generally  
248 underpowered to detect small differences in performance across conditions after 48 hrs of  
249 training. Thus, we did not directly compare behavioral changes across training conditions.

250

251

## 252 **Results**

### 253 **Stimulus-evoked whisker movement**

254 We first calibrated the degree of whisker deflection introduced by the gated air current,  
255 using video analysis in a head-fixed, anaesthetized mouse (Fig 1; S1-3 Videos). The air current  
256 was gated by a solenoid valve, and the position of the tube relative to the vibrissae was similar  
257 to that in the homecage training apparatus, about 4 cm. Although this does not necessarily  
258 recapitulate the stimulus in a freely-moving animal with variable positioning across trials, it  
259 enabled us to determine the maximal effects of different stimulus levels across multiple  
260 whiskers, i.e. those closest and further from the stimulus source. Individual whiskers were  
261 identified and movement tracked using custom software ((14),  
262 <https://github.com/RoboDoig/dlc-cloudml>). For whiskers closer to the stimulus, whisker  
263 movement was continuous when the solenoid valve was open (500 ms) and scaled with  
264 stimulus intensity (Fig 1B). More distant whiskers showed lower deflections that did not  
265 necessarily scale, likely because of non-linearities in how air currents disperse in a complex

266 environment, as well as variations in the length of individual whiskers (Fig 1C,D). Overall, we  
267 found that the positioning of the air current above and to the right of the animal's head lead to a  
268 broad and prolonged movement of ~1-5 mm for all the whiskers depending on location.  
269 Because animals are freely-moving and because positioning will differ across individual trials, it  
270 is likely that this controlled environment does not precisely reflect stimulus properties  
271 experienced by animals during sensory association training. However, these measurements  
272 provide a reference point for other studies that might employ an air current stimulus.

273

#### 274 **Figure 1. Airpuff intensity and whisker movement.**

275 A) Left, air nozzle tip is located approximately 4 cm above whiskers. Right, three whiskers  
276 analyzed in B-D. B) Left, example movement traces of the whisker indicated in (A) at 3 different  
277 air puff strengths; 1, 5, and 9 psi. Black bars indicate air puff duration (500 ms). Right, average  
278 movement (area under the curve in the left graph) of the whisker indicated in (A) at 3 different  
279 air puff strengths. Average of 50 air puffs. C-D) Same as in B, for whiskers 2 and 3,  
280 respectively.

281

### 282 **Automated training for sensory association learning**

283 Our prior studies have used a 6 psi multiwhisker stimulus coupled to a water reward to  
284 drive association learning (11). Because animals were not water deprived and could freely  
285 initiate trials, this training environment has the advantage of being both low-stress for the animal  
286 and scalable so that multiple animals can be trained in parallel with little intervention from the  
287 investigator.

288

289 Individually-housed animals were acclimated to the training cage for 24 hrs prior to  
290 sensory association training (SAT; Fig 2A-C). After 24 hrs, we introduced the airpuff stimulus, so

291 that animals only received water when it was coupled to a prior airpuff, for 80% of initiated trials.  
292 Blank trials occurred at the remaining 20% of trials, when the animal initiated a nosepoke but  
293 neither stimulus nor water were delivered. This trial structure allowed us to compare licking for  
294 stimulus versus blank trials for each animal to obtain an individual metric that reflects learning  
295 for each animal. SAT-dependent changes in anticipatory licking 300 ms prior to water delivery  
296 was used as an indicator of sensory association learning (Fig 2D,E), which progressively  
297 increased in stimulus-reward trials over the training period. At the onset of training, animals  
298 displayed a suppression of licking behavior during stimulus trials reflected in greater licking on  
299 “blank” trials compared to stimulus trials, likely due to the novelty of the stimulus (\* in Fig 2G).  
300 Animals rapidly habituated to the stimulus, and analysis of performance ( $L_w - L_b$ ) shows a steady  
301 increase in anticipatory licking over the 48 hr period of SAT (Fig 2F,G). Increases in  
302 performance were driven primarily by increased licking in stimulus trials, not suppressed licking  
303 in “blank” trials.

304 Although licking behavior was variable across animals, the majority (11/15) of animals  
305 showed an increase in anticipatory licking by the end of 48 hrs of SAT and this change in  
306 behavior was statistically significant (Fig 2F-H). These results show that SAT rapidly drives  
307 changes in behavior, measured both by habituation to the stimulus in the first 24 hrs of training  
308 and by significant increases in anticipatory licking in the majority of animals after 48 hrs of  
309 training.

310

## 311 **Figure 2. SAT drives changes in anticipatory licking.**

312 A) Left, schematic of the homecage training apparatus. Right, freely-moving mouse positioned  
313 at lick port. B) Behavioral paradigm for association of air puff and water delivery. Animals initiate  
314 trials by breaking an infrared beam at the nosepoke, resulting in a random delay ranging from  
315 0.2-0.8 s followed by a 500 ms air puff (grey bar). Water delivery occurs 500 ms after the end of  
316 the air puff, lasting 75 ms. Trials cannot be reinitiated for 2 s following air puff onset. C) Reward

317 contingencies during training. Left, during the initial 24 hour acclimation period, animals receive  
318 water on 80% of initiated trials with no air puff. Right, during the training period, animals receive  
319 air puff and water on 80% of initiated trials. D) Mean lick frequency for water delivery (green) or  
320 blank (red) trials for the acclimation period, binned at 10Hz. Water delivery time indicated by a  
321 blue bar. E) As in (D) but with air puff-water coupling. Air puff timing indicated by grey shading.  
322 F) Mean lick frequency for water and blank trials, binned at 4 hr intervals. Air puff set at 6 psi  
323 and association training is indicated at t=0 (12 noon/daylight period). Mean lick frequency for  
324 water delivery (green) or blank (red) trials is overlaid upon mean number of initiated trials (grey)  
325 across training days. G) Mean performance (lick frequency for water trials – lick frequency for  
326 blank trials) for each 4 hour bin during the acclimation period (-24 to 0 hr) and training phases (0  
327 to 48 hrs). H) Mean lick frequency for the last 20% of total trials for each animal exposed to 6  
328 psi intensity air puff. N=15 animals.

329

## 330 **SAT is whisker-dependent**

331 To determine whether animals were using the facial vibrissae for sensory association  
332 learning, we tested whether they could perform the task in the absence of the large facial  
333 vibrissae. Initially, we carried out control experiments on mice exposed to isoflurane anesthesia  
334 where whiskers were not removed, since this is typically used to immobilize animals for whisker  
335 plucking and would be required for comparison. Inhalation isoflurane exposure was brief (~1  
336 minute) and was carried out prior to the first acclimation day in the training cage (Fig 3A).  
337 Surprisingly, isoflurane exposure alone, where all whiskers were intact, was sufficient to  
338 suppress SAT-associated changes in behavior after 48 hrs of SAT with the 6 psi stimulus (Fig  
339 3A-C). An increase in anticipatory licking was almost never observed in the isoflurane-exposed  
340 training cohort (only 1/6 showed greater  $L_w-L_b$  after 48 hrs of SAT). Because animals showed a  
341 transient decline in licking to stimulus trials in the first few hours of training, it appears that they

342 may be able to initially detect the stimulus. Thus, we conclude that isoflurane exposure may  
343 suppress rapid learning in SAT.

344 To determine whether facial whiskers were required for sensory learning, we used an  
345 alternate approach, taking advantage of a natural behavior in laboratory mice, where the large  
346 facial vibrissae are sometimes removed by cagemates. We opportunistically identified animals  
347 aged P22-28 from our C57/BL6 colony that lacked whiskers and tested them with the SAT task.  
348 On average, barbered animals failed to increase anticipatory licking after 48 hrs of SAT. It is  
349 possible that barbered animals retained some fine vibrissae at the mystacial whisker pad, or  
350 they could detect the air current using other whiskers that remained (for example, around the  
351 eyes, at the ears, or around the mouth). Lack of the transient decline in licking behavior during  
352 stimulus trials suggests that recognition of the air puff is hindered without these large facial  
353 vibrissae. These data suggest that the large facial vibrissae are required for learning in this  
354 sensory association task.

355

### 356 **Figure 3. Isoflurane and absence of whiskers suppresses learning.**

357 A) Mice were exposed to isoflurane until breathing slowed and then placed in training chamber  
358 for acclimation period followed by training. Air puff set at 6 psi and association training is  
359 indicated at  $t=0$  (12 noon/daylight period). Mean lick frequency for water delivery (green) or  
360 blank (red) trials, binned at 4 hr intervals, is overlaid upon mean number of initiated trials (grey)  
361 across training days. B) Mean performance (lick frequency for water trials – lick frequency for  
362 blank trials) for each 4 hour bin during the acclimation period (-24 to 0 hr) and training phases (0  
363 to 48 hrs). C) Mean lick frequency for the last 20% of total trials for each isoflurane induced  
364 animal exposed to 6 psi intensity air puff. N=6 animals. D) Whiskers were barbered by cage  
365 mates prior to training. No isoflurane was used. Same as in (A) but with barbered animals. E)  
366 Same as in (B) but with barbered animals. F) Same as in (C) but with barbered animals. N=9  
367 animals.

368

## 369 **Stimulus intensity influences learning**

370 Our prior studies used a moderate stimulus intensity that balanced animal participation  
371 and learning speed. To systematically determine how stimulus intensity would influence the  
372 trajectory of behavioral change, we compared the effects of training using a lower and a higher-  
373 intensity airpuff stimulus. When the airpuff stimulus was low (2 psi), 48 hrs of SAT was not  
374 sufficient to drive a significant change in anticipatory licking on average across the test group.  
375 The lack of significance was driven primarily by heterogeneity in comparative lick frequency,  
376 since some animals showed a large increase in anticipatory licking and others showed no  
377 difference or greater licking on “blank” trials (12/21 animals showed  $L_w > L_b$ , Fig 4C). In contrast,  
378 SAT with higher-intensity (9 psi) airpuff stimuli did drive significant change after 48 hrs SAT on  
379 average (6/7 animals showed  $L_w > L_b$ ; Fig 4D-F).

380 The efficacy of training with a higher-intensity stimulus were mitigated by the large  
381 number of animals that chose not to participate in the training paradigm, i.e. stopped initiating  
382 trials in the first few hours of SAT. Animal drop-out was never observed with low or medium  
383 intensity stimuli but frequently with high intensity stimuli (8/15 animals did not participate in  
384 training; Fig 4G). By 48 hrs of SAT, average performance for medium and high stimulus  
385 intensities were similar and low intensity stimuli was modestly lower. Although high stimulus  
386 intensity was correlated with a smaller number of initiated trials after 24 hrs of SAT, the mean  
387 number of initiated trials was similar across conditions by the second training day (Fig 4I). Thus,  
388 SAT with medium intensity stimuli provides a good balance between ensuring that the majority  
389 of animals participate in the training paradigm and driving rapid and significant behavioral  
390 change across the majority of participants.

391

392 **Figure 4. Stimulus intensity alters learning trajectory**



393 A) Air puff was set at 1-2 psi and association training is indicated at t=0 (12 noon/daylight  
394 period). Mean lick frequency for water delivery (green) or blank (red) trials, binned at 4 hr  
395 intervals, is overlaid upon mean number of initiated trials (grey) across training days. B) Mean  
396 performance (lick frequency for water trials – lick frequency for blank trials) at 1-2 psi air puff  
397 intensity for each 4 hour bin during the acclimation period (-24 to 0 hr) and training phases (0 to  
398 48 hrs). C) Mean lick frequency for the last 20% of total trials for each animal exposed to 1-2 psi  
399 air puff intensity. N=21 animals. D) Air puff set at 9 psi. Same as in (A) but with air puff intensity  
400 set at 9 psi. E) Same as in (B) but with air puff intensity set at 9 psi. F) Same as in (C) but with  
401 air puff intensity set at 9 psi. G) Percent participation of animals in behavioral task at different air  
402 puff intensities. H) Mean performance during the last 20% of total trials at different air puff  
403 intensities after 24 hours (light grey) and 48 hours (dark grey) of training. I) Mean number of  
404 trials for each day during the first and second days of training for different air puff intensities.  
405

## 406 **Reducing reward probability does not suppress learning**

407 Reward probability will influence learning trajectories, since infrequent pairing of stimuli  
408 with reward can make it more difficult to build an association. We compared the trajectory of  
409 learning using a medium intensity stimulus on a modified reward schedule, where stimulus-  
410 water coupling occurred on 50% of trials, versus 80% in our initial studies (Fig 5A).

411 Reducing the fraction of stimulus and reward trials did not slow learning trajectories over  
412 the 48 hr training period; indeed, performance was moderately enhanced using the 50% reward  
413 frequency compared to the 80% used in Figs 2 and 3. The overall number of trials conducted  
414 during 50% reward frequency was higher than with 80% reward frequency; however, the same  
415 amount of water was elicited per day. The fraction of animals that showed greater  $L_w > L_b$  was  
416 similar between the two conditions (80% reward: 11/15 versus, 50% reward: 8/11; or ~72% for

417 both). These data indicate that the automated sensory association paradigm can be modified to  
418 adjust reward contingencies at different stages of training to probe the effects on behavior.

419

## 420 **Figure 5. Learning is maintained with reduced reward frequency**

421 A) Reward contingencies during training. Left, during the initial 24 hour acclimation period,  
422 animals receive water on 50% of initiated trials with no air puff. Right, during the training period,  
423 animals receive air puff and water on 50% of initiated trials, and no air puff nor water on the  
424 remaining 50%. B) Air puff set at 6 psi and association training is indicated at t=0 (12  
425 noon/daylight period). Mean lick frequency for water delivery (green) or blank (red) trials, binned  
426 at 4 hr intervals, is overlaid upon mean number of initiated trials (grey) across training days. C)  
427 Mean performance (lick frequency for water trials – lick frequency for blank trials) of mice  
428 experiencing 50/50 paradigm (grey) or 80/20 paradigm (black) for each 4 hour bin during  
429 acclimation period (-24 to 0 hr) and training phases (0 to 48 hrs). D) Mean lick frequency for the  
430 last 20% of total trials for each animal exposed to a 50/50 contingency. N=11 animals.

431

## 432 **SAT drives perceptual learning**

433 Prior studies have suggested that sensory stimulation can alter cortical response  
434 properties in the absence of learned associations, increasing the number of neurons that spike  
435 in response to a weak stimulus after some period of sensory exposure (15). Such a finding  
436 suggests that perceptual thresholds might be lowered in this sensory training  
437 paradigm. Perceptual learning is typically defined as long-lasting changes in perception due to  
438 practice or experience. To determine whether SAT might be associated with an increase in  
439 perceptual acuity, we trained animals using a medium-intensity stimulus (6 psi) for 48 hours,  
440 and then tested them with a low-intensity stimulus (2 psi) that by itself did not drive significant  
441 changes in behavior (Fig 6A). Because animals do not reliably show a change in licking

442 behavior when trained for two days with a low-intensity stimulus (Fig 4A-C), increased licking  
443 responses to the low-intensity stimulus after training with medium-intensity airpuff would provide  
444 evidence for perceptual learning.

445 As expected, animals showed a significant increase in anticipatory licking after 48 hrs of  
446 training with the medium-intensity stimulus (10/14 animals showed a significant difference in  
447 licking frequency; Fig 6B-D). When the stimulus was reduced to the low-intensity airpuff at the  
448 beginning of the third training day, averaged anticipatory licking on stimulus trials was initially  
449 reduced but rapidly increased relative to “blank” trials after 24 hrs of training, a difference that  
450 was highly significant (10/14 animals showed a significant difference in licking frequency; Fig  
451 6B,C,E). Of note, the 4 animals that did not show greater stimulus-evoked licking during low-  
452 intensity stimulus training also did not exhibit altered licking responses after 48 hrs of training at  
453 the medium-intensity stimulus. These data suggest that animals can effectively transfer the  
454 association of the medium-intensity stimulus with the water reward to a lower intensity stimulus.  
455 Thus, this training assay may be an effective and high-throughput platform to study perceptual  
456 learning.

457

458 **Figure 6. Decreased detection threshold after training suggests perceptual learning.**

459 A) Reward contingencies during training. Left, during the initial 24 hour acclimation period,  
460 animals receive water on 80% of initiated trials with no air puff. Middle, during the first training  
461 period, animals receive water and an air puff at 6 psi intensity on 80% of initiated trials for 2  
462 days. Right, during the second training period, animals receive water and an air puff at 1 psi  
463 intensity on 80% of initiated trials for 1 day. B) Air puff association training at 6 psi is indicated at  
464  $t=0$  (12 noon/daylight period). Air puff association training at 1 psi is indicated at  $t=48$  (12  
465 noon/daylight period). Mean lick frequency for water delivery (green) or blank (red) trials, binned  
466 at 4 hr intervals, is overlaid upon mean number of initiated trials (grey) across training days. C)  
467 Mean performance (lick frequency for water trials – lick frequency for blank trials) for each 4

468 hour bin during the acclimation period (-24 to 0 hr) and training phases (0 to 72 hrs). D) Mean  
469 lick frequency for the last 20% of total trials for each animal after 2 days of training with 6 psi air  
470 puff intensity. E) Mean lick frequency for the last 20% of total trials for each animal after 2 days  
471 of training with 6 psi air puff intensity and 1 day of training with 1 psi air puff intensity. N=14  
472 animals.

473

## 474 **Sensory discrimination training using directional air puffs**

475 The rapid change in stimulus-associated anticipatory licking using air current stimulation  
476 in the SAT paradigm suggests that multiwhisker stimulation can be a potent stimulus to drive  
477 learning. We next probed the capacity of the animal to discriminate different directions of air  
478 currents, using a similar reward schedule as before but where “blank” trials were replaced with  
479 an airpuff delivered from a different direction. Training cages were designed so that air currents  
480 could be precisely positioned relative to the whiskers, and one direction was selected as the  
481 rewarded direction.

482 Initially we selected a 180 degree difference between the rewarded and unrewarded  
483 stimulus, reasoning that this might be the most discriminable stimulus pair. Although the  
484 majority of animals showed an increase in  $L_w > L_b$  (6/9 animals), on average this difference was  
485 not significant at 48 hrs of SAT (Fig 7C-E). Reducing the angular difference between the  
486 rewarded and unrewarded stimulus to 15 degrees actually improved mean performance after 48  
487 hrs of SAT (Fig 7F-H). This improvement in performance could be observed regardless of the  
488 location of the rewarded direction (either above or below the animal; S1 Fig).

489 Animals appeared capable of even finer-scale directional discrimination, as further  
490 reducing the angular difference between the rewarded and unrewarded direction to 5 degrees  
491 continued to show an increase in mean anticipatory licking (Fig 7I-K). These results indicate that

492 mice have an extraordinary ability to differentiate between air current directions and suggest  
493 that the facial vibrissae may be specially tuned to this stimulus feature.

494

495 **Figure 7. Mice can discriminate air puff direction**

496 A) Left, profile view of bidirectional air puff training apparatus. Right, lick port and air puff  
497 position within automated homecage training apparatus. B) Reward contingencies during  
498 training. Left, during the initial 24 hour acclimation period, animals receive water on 80% of  
499 initiated trials with no air puff. Right, during the training period, animals receive water and an air  
500 puff from one direction on 80% of initiated trials, and an air puff from a different direction without  
501 water on the remaining 20% of trials. C) Mean lick frequency of animals exposed to air puffs 180  
502 degrees apart for water and blank trials, binned at 4 hr intervals. Air puff association training is  
503 indicated at  $t=0$  (12 noon/daylight period). Mean lick frequency for water delivery (green) or  
504 blank (red) trials is overlaid upon mean number of initiated trials (grey) across training days. D)  
505 Mean performance (lick frequency for water trials – lick frequency for blank trials) for each 4  
506 hour bin during the acclimation period (-24 to 0 hr) and training phases with air puffs 180  
507 degrees apart (0 to 48 hrs). E) Mean lick frequency of each animal exposed to air puffs 180  
508 degrees apart for the last 20% of total trials. N=9 animals. F) Same as in (C) but with animals  
509 exposed to air puffs 15 degrees apart, projecting downwards. G) Same as in (D) but with  
510 animals exposed to air puffs 15 degrees apart, projecting downwards. H) Same as in (E) but  
511 with animals exposed to air puffs 15 degrees apart, projecting downwards. N=9 animals. I)  
512 Same as in (C) but with animals exposed to air puffs 5 degrees apart, projecting downwards. J)  
513 Same as in (D) but with animals exposed to air puffs 5 degrees apart, projecting downwards. K)  
514 Same as in (E) but with animals exposed to air puffs 5 degrees apart, projecting downwards.  
515 N=6 animals.

516

517

## 518 **Enhanced reward valence does not improve performance**

519 Changing the water reward to a more desirable reward, such as aspartame, could  
520 influence learning trajectory, since mice may initiate more trials in order to obtain more of the  
521 desirable reward or because reward signals that regulate learning are stronger. On acclimation  
522 day, mice were supplied with water on 80% of initiated nosepokes. At the onset of SAT, water  
523 was replaced with an aspartame-containing solution.

524 Animals showed significant increased anticipatory licking behavior to the stimulus at the  
525 end of the 48 hrs training period (Fig 8B-D), similar to the performance of interleaved control  
526 animals also trained to the 6 psi stimulus but with a water reward. On average, aspartame-  
527 trained animals showed a higher number of trials compared to water-trained animals, a  
528 difference that was not significant (mean $\pm$ SEM: Water 389 $\pm$ 85 trials/day, N=6 mice; Aspartame  
529 492 $\pm$ 41, N=9 mice; p=0.25). Analysis of behavioral change over time suggested that the  
530 increase in licking on stimulus trials versus blank trials for aspartame-trained animals might be  
531 delayed compared to mice that only received water. This delayed separation suggests that at  
532 least in our experimental set-up, aspartame replacement does not facilitate learning trajectory.  
533 These findings are consistent with prior results indicating that reward palatability does not  
534 strongly influence learning in rodents (16).

535

### 536 **Figure 8. Aspartame does not enhance learning with 48 hrs SAT**

537 A) Reward contingencies during training. Left, during the initial 24 hour acclimation period,  
538 animals receive water on 80% of initiated trials with no air puff. Right, during the training period,  
539 animals receive air puff and aspartame on 80% of initiated trials. B) Mean lick frequency for  
540 water and blank trials, binned at 4 hr intervals. Air puff set at 6 psi and association training is  
541 indicated at t=0 (12 noon/daylight period). Mean lick frequency for water/aspartame delivery  
542 (green) or blank (red) trials is overlaid upon mean number of initiated trials (grey) across training

543 days. C) Mean performance (lick frequency for water/aspartame trials – lick frequency for blank  
544 trials) for each 4 hour bin during the acclimation period (-24 to 0 hr) and training phases (0 to 48  
545 hrs). D) Mean lick frequency for the last 20% of total trials for each animal exposed to  
546 aspartame and 6 psi air puff. N=9 animals.

547

## 548 **Discussion**

### 549 **Summary**

550 We developed a homepage, automated behavioral training system for freely-moving  
551 animals that coupled a multiwhisker stimulus with water reward. We extended our previous  
552 study (11) by modulating training parameters to investigate the whisker-dependence, stimulus-  
553 intensity, reward frequency and valence, and directional discrimination capabilities of animals  
554 trained in this environment. We find that multiwhisker stimulation is a potent sensory modality to  
555 drive sensory learning, and our results establish that multiwhisker stimulation is a robust and  
556 easily adapted system for sensory association training in mice.

557

### 558 **Benefits of automated training**

559 Automated behavioral paradigms, such as the IntelliCage (17–20), have been used in  
560 other studies to train animals for discrimination of odors (21–23), oriented lines (24,25), and  
561 auditory tones (26–28). Several studies also used automated set-ups for motor control tasks  
562 (29–32). Automated training improves standardization across experimenters and different  
563 laboratories (32,33) and allows for minimal experimenter contact with mice which reduces the  
564 stress associated with handling (34–36). In addition, the use of a freely-moving behavioral  
565 paradigm carried out in the homepage environment further reduces stress (33–35). In our

566 assay, animals were not water restricted, an arrangement that further reduces animal stress and  
567 the burden of experimenter monitoring and documentation (37).

568 Automated training significantly increases experimental throughput, a particular  
569 advantage for experiments that require large numbers of animals (11,27). Importantly,  
570 behavioral data were automatically collected using our custom-designed Arduino system,  
571 allowing remote data access and rapid analysis for long training periods. Due to this ease of  
572 use, our automated sensory training system could be used for phenotypic characterization of  
573 mutant strains (see for example (38–42)).

574 We designed an automated behavioral training chamber that would reliably deliver a  
575 multiwhisker stimulus. An advantage of multiwhisker stimulation is that it can be delivered  
576 without the application of artificial agents for magnetic whisker deflection (43,44), does not  
577 require precise animal positioning for delivery and is thus suitable for freely-moving animals,  
578 and provides a large anatomical area – >400  $\mu\text{m}^2$  of the posterior-medial barrel subfield  
579 representing the large facial vibrissae –for detailed anatomical and neurophysiological analysis.

580

## 581 **Task design and classical conditioning**

582 Although SAT in this study has many components of a classical Pavlovian conditioning  
583 task, it differs in several important respects. First, because animals self-initiate trials, there is an  
584 operant aspect to the trial design. Second, the response to the stimulus, licking, is under  
585 voluntary control (45). Furthermore, the learned behavior contains the incentive of receiving  
586 water which is aligned with operant conditioning since Pavlovian conditioning has no incentives  
587 associated.

588 The 500ms delay between air puff termination and water delivery in this task classifies it  
589 as a trace conditioning. This type of conditioning is different than delay conditioning in which  
590 one stimulus is presented, followed by a second stimulus, and both stimuli are then terminated



591 at the same time, a training paradigm that may engage different neural circuits in the brain.  
592 Delay conditioning typically requires the cerebellum and is not associated with a conscious  
593 awareness of the relationship between the two stimuli. Trace conditioning also requires the  
594 cerebellum, however, the hippocampus and neocortex are additionally needed for accurate  
595 completion of the task (46). Therefore, SAT as implemented by this homecage training  
596 environment is likely to engage multiple brain circuits and may be well-suited for the analysis of  
597 cortical circuit changes during learning.

598

## 599 **Training modifications using multiwhisker stimulation**

600 An advantage of this training set up is that multiwhisker stimulation parameters can be  
601 adjusted for a large variety of learning objective. For example, animals can be trained to detect  
602 whisker stimulation one side of the face, and then tested on association learning with stimulation  
603 to the opposite side. Different patterns (duration, frequencies, or directions) of multiwhisker  
604 stimuli can be used to probe more complex forms of associative learning. In addition, water  
605 delivery can be decoupled from the stimulus in this training environment to look at stimulus-  
606 dependent changes in cortical response properties in the absence of learning (11).

607

## 608 **Animal-to-animal variability**

609 Using a multiwhisker stimulus to drive associative learning behavior revealed a  
610 substantial amount of variability across animals in learning trajectories in our study. This  
611 variability was captured by reported raw values for lick rates, instead of a  $d'$  measurement that  
612 normalizes behavioral measurements. What might account for this? Using a simple criterion of  
613 greater lick frequency in stimulus versus blank trials ( $L_w > L_b$ ) as evidence of learning, we  
614 observed that weak airpuff intensity was correlated with a marked reduction in the fraction of  
615 animals that learned. At 48 hrs of SAT with 1-2 psi, 55% of mice showed  $L_w > L_b$ , but with 9 psi,

616 86% of animals showed this. It was clear that the 9 psi stimulus was more salient, as more than  
617 half the animals stopped approaching the lickport for water in this condition, likely due to the  
618 aversive quality of the high-intensity airpuff. At 1-2 psi, all animals participated throughout the  
619 training period, consistent with the interpretation that lower stimulus intensities may be less  
620 aversive but may be more difficult to detect, particularly for some animals. Differences between  
621 animal strategies for receiving the stimulus may also explain across animal heterogeneity in  
622 performance (see for example (47)). Although our automated approach sought to reduce animal  
623 stress from handling that can influence learning behaviors in mice (48), individual mice can  
624 show variable levels of anxiety that can also influence learning (49). The reported variability in  
625 behavioral performance during this automated SAT paradigm may be useful in examining  
626 causal relationships between learning and cellular and synaptic changes in the mouse brain.

627

## 628 **Acknowledgements**

629 Special thanks to Dylan McCreary, Rogan Grant, and Stefan Bernhard for early contributions to  
630 cage design, and members of the Barth lab for critical comments on the manuscript.

631

## 632 **Author Contributions**

633 Conceptualization: Sarah Bernhard, Jiseok Lee, Andrew Hires, Alison Barth

634 Formal analysis: Sarah Bernhard, Alex Lee, Andrew Erskine

635 Funding acquisition: Sarah Bernhard, Sam Hires, Alison Barth

636 Investigation: Sarah Bernhard, Jiseok Lee, Mo Zhu

637 Methodology: Sarah Bernhard, Alex Lee, Andrew Erskine, Sam Hires,

638 Validation: Sarah Bernhard, Jiseok Lee, Mo Zhu

639 Visualization: Sarah Bernhard, Alison Barth

640 Writing ± original draft: Alison Barth

641 Writing ± review & editing: Sarah Bernhard and Alison Barth

642

643

644

645

## 646 **References**

- 647 1. O'Connor DH, Hires SA, Guo Z V., Li N, Yu J, Sun QQ, et al. Neural coding during active  
648 somatosensation revealed using illusory touch. *Nat Neurosci.* 2013;
- 649 2. Margolis DJ, Lütcke H, Schulz K, Haiss F, Weber B, Kügler S, et al. Reorganization of  
650 cortical population activity imaged throughout long-term sensory deprivation. *Nat*  
651 *Neurosci.* 2012;
- 652 3. Glazewski S, Fox K. Time course of experience-dependent synaptic potentiation and  
653 depression in barrel cortex of adolescent rats. *J Neurophysiol.* 1996;
- 654 4. Clem RL, Barth A. Pathway-specific trafficking of native AMPARs by in vivo experience.  
655 *Neuron.* 2006;
- 656 5. Clancy KB, Schnepel P, Rao AT, Feldman DE. Structure of a single whisker  
657 representation in layer 2 of mouse somatosensory cortex. *J Neurosci.* 2015;
- 658 6. Polley DB, Chen-Bee CH, Frostig RD. Two directions of plasticity in the sensory-deprived  
659 adult cortex. *Neuron.* 1999;
- 660 7. Celikel T, Sakmann B. Sensory integration across space and in time for decision making  
661 in the somatosensory system of rodents. *Proc Natl Acad Sci U S A.* 2007;
- 662 8. Houweling AR, Brecht M. Behavioural report of single neuron stimulation in  
663 somatosensory cortex. *Nature.* 2008;
- 664 9. Estebanez L, Boustani S El, Destexhe A, Shulz DE. Correlated input reveals coexisting  
665 coding schemes in a sensory cortex. *Nat Neurosci.* 2012;
- 666 10. Jouhanneau JS, Ferrarese L, Estebanez L, Audette NJ, Brecht M, Barth AL, et al.  
667 Cortical fos GFP expression reveals broad receptive field excitatory neurons targeted by  
668 pom. *Neuron.* 2014;

- 669 11. Audette NJ, Bernhard SM, Ray A, Stewart LT, Barth AL. Rapid Plasticity of Higher-Order  
670 Thalamocortical Inputs during Sensory Learning. *Neuron*. 2019;
- 671 12. Pluta SR, Lyall EH, Telian GI, Ryapolova-Webb E, Adesnik H. Surround Integration  
672 Organizes a Spatial Map during Active Sensation. *Neuron*. 2017;
- 673 13. Dehnhardt G, Mauck B, Hanke W, Bleckmann H. Hydrodynamic trail-following in harbor  
674 seals (*Phoca vitulina*). *Science* (80- ). 2001;
- 675 14. Nath T, Mathis A, Chen AC, Patel A, Bethge M, Mathis MW. Using DeepLabCut for 3D  
676 markerless pose estimation across species and behaviors. *Nat Protoc*. 2019;
- 677 15. Glazewski S, Barth AL. Stimulus intensity determines experience-dependent  
678 modifications in neocortical neuron firing rates. *Eur J Neurosci*. 2015;
- 679 16. Mosberger AC, De Clauser L, Kasper H, Schwab ME. Motivational state, reward value,  
680 and Pavlovian cues differentially affect skilled forelimb grasping in rats. *Learn Mem*.  
681 2016;
- 682 17. Lipp H-P, Litvin O, Galsworthy M, Vyssotski DL, Vyssotski a L, Zinn P, et al. Automated  
683 behavioral analysis of mice using INTELLICAGE: inter-laboratory comparisons and  
684 validation with exploratory behavior and spatial learning. *Proc Meas Behav 2005*. 2005;
- 685 18. Endo T, Maekawa F, Vöikar V, Haijima A, Uemura Y, Zhang Y, et al. Automated test of  
686 behavioral flexibility in mice using a behavioral sequencing task in IntelliCage. *Behav*  
687 *Brain Res*. 2011;
- 688 19. Voikar V, Colacicco G, Gruber O, Vannoni E, Lipp HP, Wolfer DP. Conditioned response  
689 suppression in the IntelliCage: Assessment of mouse strain differences and effects of  
690 hippocampal and striatal lesions on acquisition and retention of memory. *Behav Brain*  
691 *Res*. 2010;
- 692 20. Vannoni E, Voikar V, Colacicco G, Sánchez MA, Lipp HP, Wolfer DP. Spontaneous  
693 behavior in the social homecage discriminates strains, lesions and mutations in mice. *J*  
694 *Neurosci Methods*. 2014;

- 695 21. He J, Wei J, Rizak JD, Chen Y, Wang J, Hu X, et al. An odor detection system based on  
696 automatically trained mice by relative go no-go olfactory operant conditioning. *Sci Rep.*  
697 2015;
- 698 22. Reinert JK, Schaefer AT, Kuner T. High-Throughput Automated Olfactory Phenotyping of  
699 Group-Housed Mice. *Front Behav Neurosci.* 2019;13(December):1–13.
- 700 23. Erskine A, Bus T, Herb JT, Schaefer AT. Autonomouse: High throughput operant  
701 conditioning reveals progressive impairment with graded olfactory bulb lesions. *PLoS*  
702 *One.* 2019;
- 703 24. Aoki R, Tsubota T, Goya Y, Benucci A. An automated platform for high-throughput mouse  
704 behavior and physiology with voluntary head-fixation. *Nat Commun.* 2017;
- 705 25. Meier P, Flister E, Reinagel P. Collinear features impair visual detection by rats. *J Vis.*  
706 2011;
- 707 26. De Hoz L, Nelken I. Frequency tuning in the behaving mouse: Different bandwidths for  
708 discrimination and generalization. *PLoS One.* 2014;
- 709 27. Francis NA, Kanold PO. Automated operant conditioning in the mouse home cage. *Front*  
710 *Neural Circuits.* 2017;
- 711 28. Gess A, Schneider DM, Vyas A, Woolley SMN. Automated auditory recognition training  
712 and testing. *Anim Behav.* 2011;
- 713 29. Silasi G, Boyd JD, Bolanos F, LeDue JM, Scott SH, Murphy TH. Individualized tracking of  
714 self-directed motor learning in group-housed mice performing a skilled lever positioning  
715 task in the home cage. *J Neurophysiol.* 2018;
- 716 30. Bollu T, Whitehead SC, Prasad N, Walker J, Shyamkumar N, Subramaniam R, et al.  
717 Automated home cage training of mice in a hold-still center-out reach task. *J*  
718 *Neurophysiol.* 2019;
- 719 31. Fenrich KK, May Z, Torres-Espín A, Forero J, Bennett DJ, Fouad K. Single pellet  
720 grasping following cervical spinal cord injury in adult rat using an automated full-time

- 721 training robot. *Behav Brain Res.* 2016;
- 722 32. Poddar R, Kawai R, Ölveczky BP. A fully automated high-throughput training system for  
723 rodents. *PLoS One.* 2013;
- 724 33. Schaefer AT, Claridge-Chang A. The surveillance state of behavioral automation. *Current*  
725 *Opinion in Neurobiology.* 2012.
- 726 34. Balcombe JP, Barnard ND, Sandusky C. Laboratory routines cause animal stress.  
727 *Contemp Top Lab Anim Sci.* 2004;
- 728 35. Sorge RE, Martin LJ, Isbester KA, Sotocinal SG, Rosen S, Tuttle AH, et al. Olfactory  
729 exposure to males, including men, causes stress and related analgesia in rodents. *Nat*  
730 *Methods.* 2014;
- 731 36. Clarkson JM, Dwyer DM, Flecknell PA, Leach MC, Rowe C. Handling method alters the  
732 hedonic value of reward in laboratory mice. *Sci Rep.* 2018;
- 733 37. Reinagel P. Training rats using water rewards without water restriction. *Front Behav*  
734 *Neurosci.* 2018;
- 735 38. Codita A, Gumucio A, Lannfelt L, Gellerfors P, Winblad B, Mohammed AH, et al. Impaired  
736 behavior of female tg-ArcSwe APP mice in the IntelliCage: A longitudinal study. *Behav*  
737 *Brain Res.* 2010;
- 738 39. Balci F, Oakeshott S, Shamy JL, El-Khodori BF, Filippov I, Mushlin R, et al. High-  
739 Throughput Automated Phenotyping of Two Genetic Mouse Models of Huntington's  
740 Disease. *PLoS Curr.* 2013;
- 741 40. Woodard CL, Bolaños F, Boyd JD, Silasi G, Murphy TH, Raymond LA. An automated  
742 home-cage system to assess learning and performance of a skilled motor task in a  
743 mouse model of huntington's disease. *eNeuro.* 2017;
- 744 41. Richardson CA. The power of automated behavioural homecage technologies in  
745 characterizing disease progression in laboratory mice: A review. *Applied Animal*  
746 *Behaviour Science.* 2015.

- 747 42. Rudenko O, Tkach V, Berezin V, Bock E. Detection of early behavioral markers of  
748 Huntington's disease in R6/2 mice employing an automated social home cage. Behav  
749 Brain Res. 2009;
- 750 43. Clem RL, Celike T, Barth AL. Ongoing in vivo experience triggers synaptic metaplasticity  
751 in the neocortex. Science (80- ). 2008;
- 752 44. Knott GW, Quairiaux C, Genoud C, Welker E. Formation of dendritic spines with  
753 GABAergic synapses induced by whisker stimulation in adult mice. Neuron. 2002;
- 754 45. Lorenzetti FD, Mozzachiodi R, Baxter DA, Byrne JH. Classical and operant conditioning  
755 differentially modify the intrinsic properties of an identified neuron. Nat Neurosci. 2006;
- 756 46. Clark RE, Squire LR. Classical conditioning and brain systems: The role of awareness.  
757 Science (80- ). 1998;
- 758 47. Gilad A, Gallero-Salas Y, Groos D, Helmchen F. Behavioral Strategy Determines Frontal  
759 or Posterior Location of Short-Term Memory in Neocortex. Neuron. 2018;
- 760 48. Bian Y, Pan Z, Hou Z, Huang C, Li W, Zhao B. Learning, memory, and glial cell changes  
761 following recovery from chronic unpredictable stress. Brain Res Bull. 2012;
- 762 49. Olausson P, Kiraly DD, Gourley SL, Taylor JR. Persistent effects of prior chronic  
763 exposure to corticosterone on reward-related learning and motivation in rodents.  
764 Psychopharmacology (Berl). 2013;

765

766

## 767 **Supporting information**

768 **S1 Video. Example video clip taken for whisker video analysis at 1 psi**

769 **S2 Video. Example video clip taken for whisker video analysis at 5 psi**

770 **S3 Video. Example video clip taken for whisker video analysis at 9 psi**

771

772 **S1 Figure. Discrimination using directional air puff alters learning rate at 15 degrees. A)**  
773 Profile view of bidirectional air puff training apparatus. B) Reward contingencies during training.  
774 Left, during the initial 24 hour acclimation period, animals receive water on 80% of initiated trials  
775 with no air puff. Right, during the training period, animals receive water and an air puff from one  
776 direction on 80% of initiated trials, and an air puff from a different direction without water on the  
777 remaining 20% of trials. C) Mean lick frequency of animals exposed to air puffs 15 degrees apart  
778 for water and blank trials, binned at 4 hr intervals. Air puff association training is indicated at t=0  
779 (12 noon/daylight period). Mean lick frequency for water delivery (green) or blank (red) trials is  
780 overlaid upon mean number of initiated trials (grey) across training days. D) Mean performance  
781 (lick frequency for water trials – lick frequency for blank trials) for each 4 hour bin during the  
782 acclimation period (-24 to 0 hr) and training phases with air puffs 15 degrees apart (0 to 48 hrs).  
783 E) Mean lick frequency of each animal exposed to air puffs 15 degrees apart for the last 20% of  
784 total trials. N=7 animals.

785

786

### 787 **Suggested Reviewers**

788 Jerry Chen [jerchen@bu.edu](mailto:jerchen@bu.edu)

789 David Margolis [david.margolis@rutgers.edu](mailto:david.margolis@rutgers.edu)

790 Aric Agmon [aric.agmon@gmail.com](mailto:aric.agmon@gmail.com)

791 Tansu Celikel [celikel@neurophysiology.nl](mailto:celikel@neurophysiology.nl)

792 Dan O'Connor [dan.oconnor@jhmi.edu](mailto:dan.oconnor@jhmi.edu)

793

794



**A**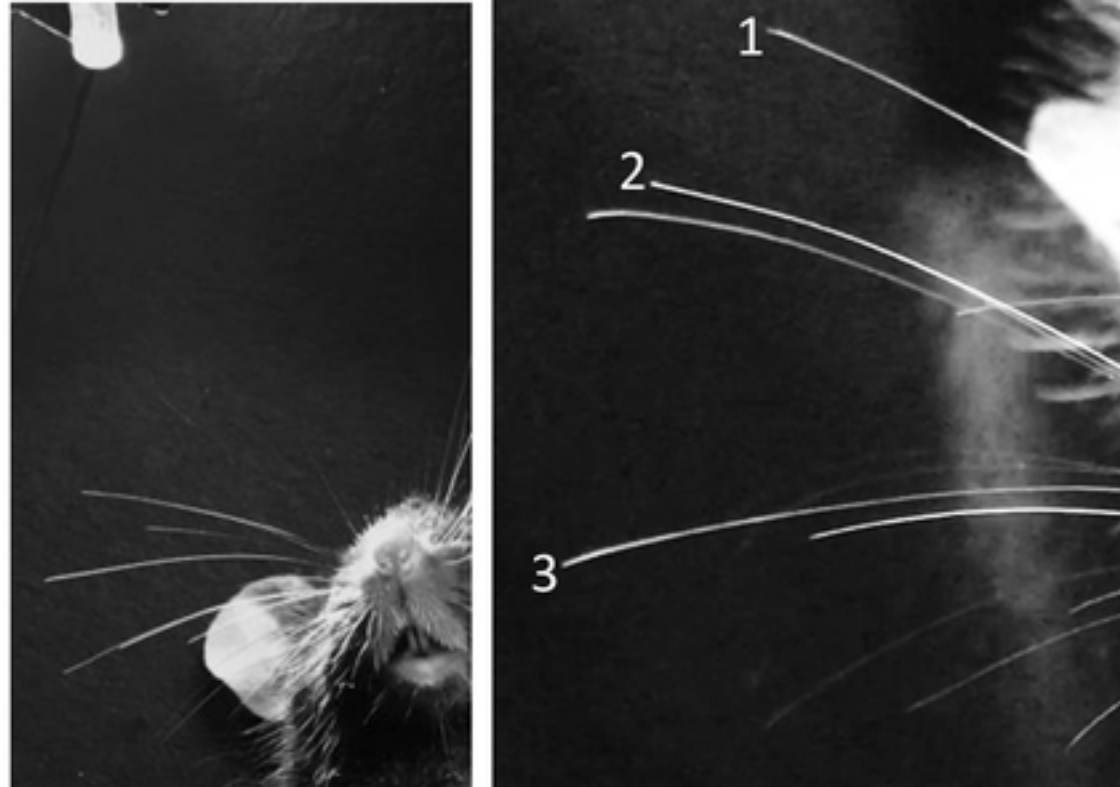**B**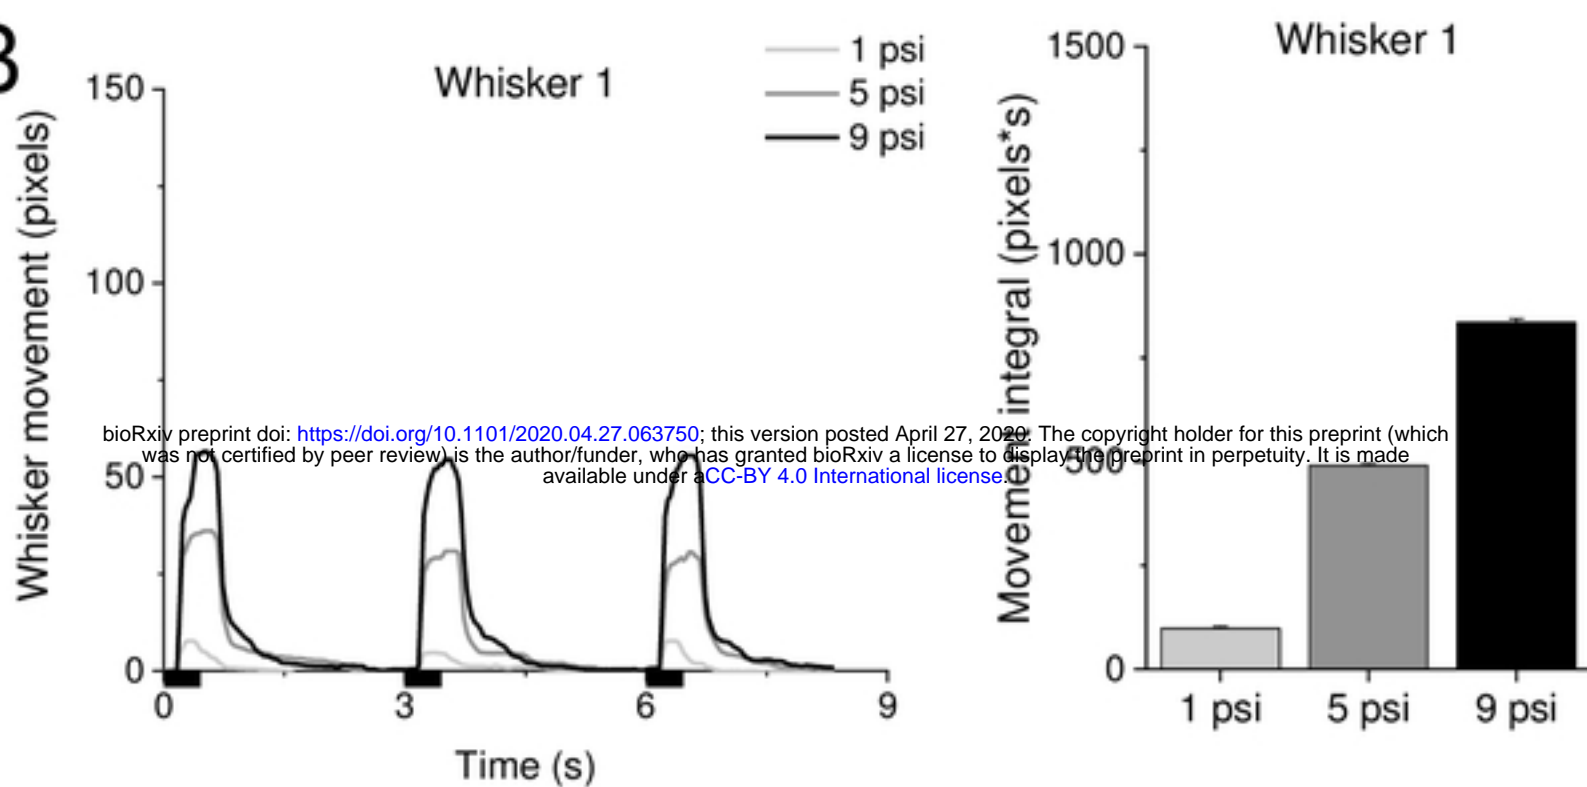**C**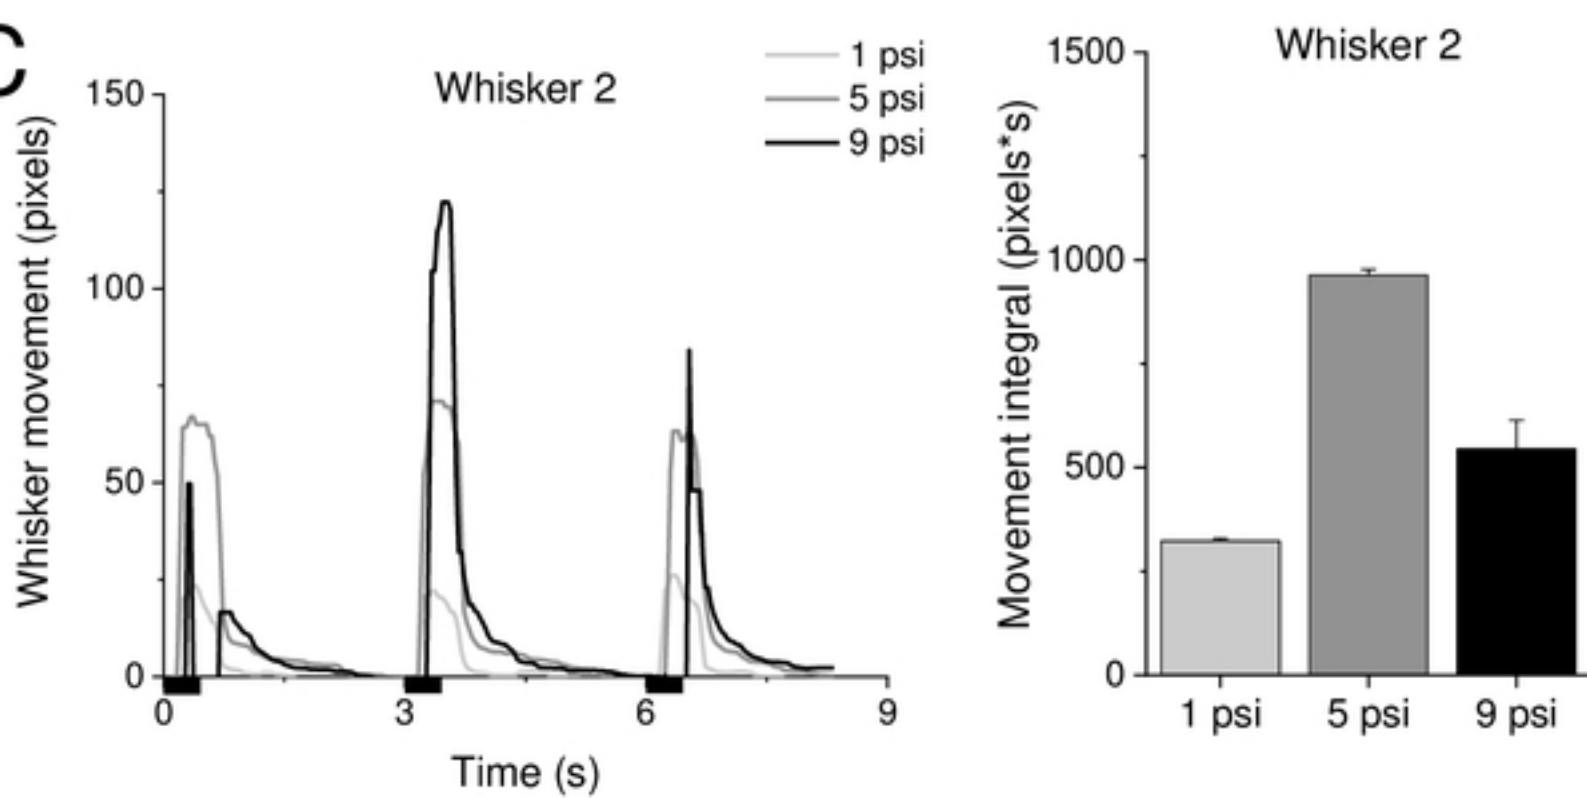**D**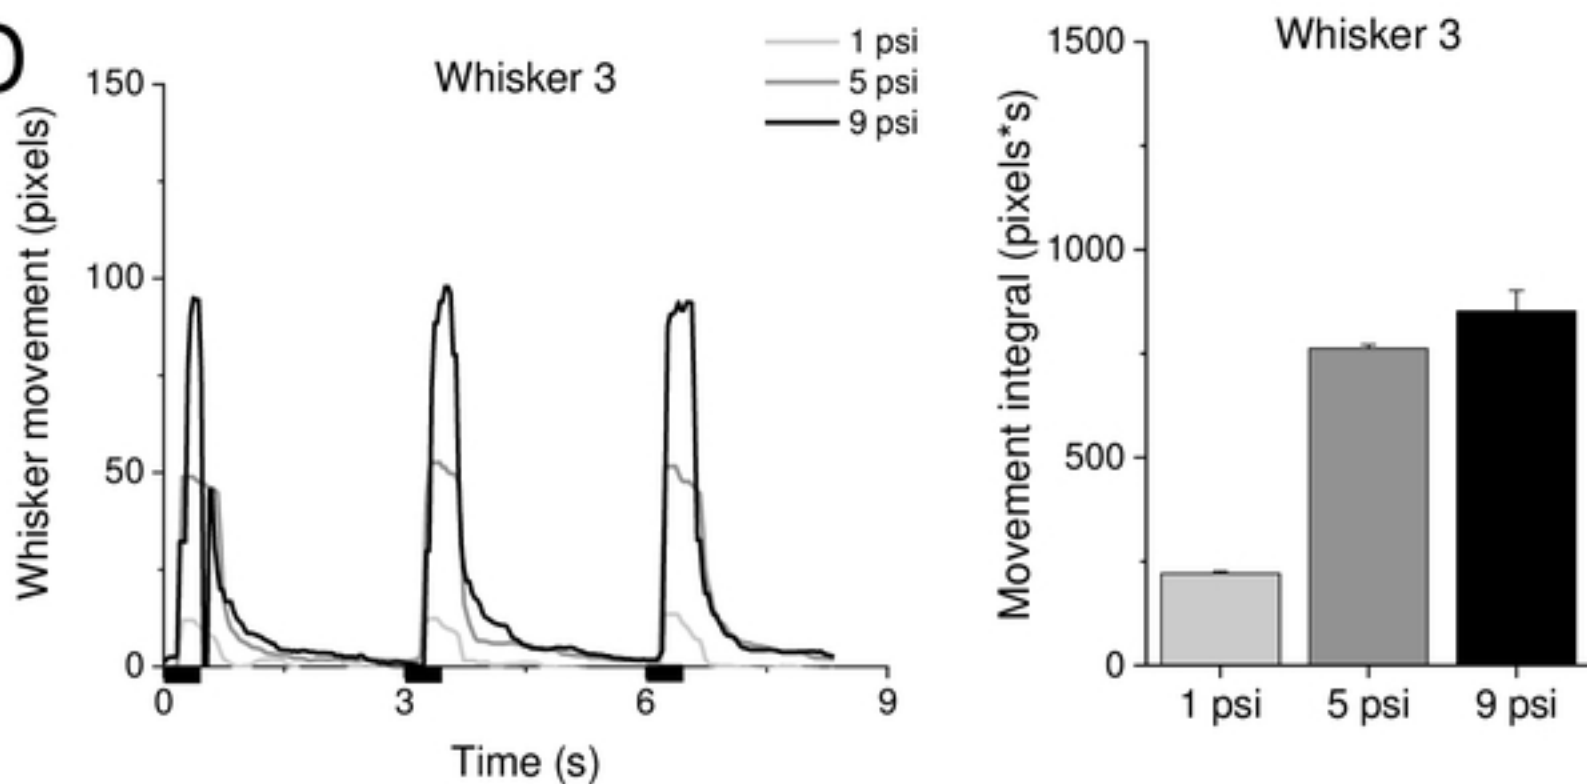**Figure**

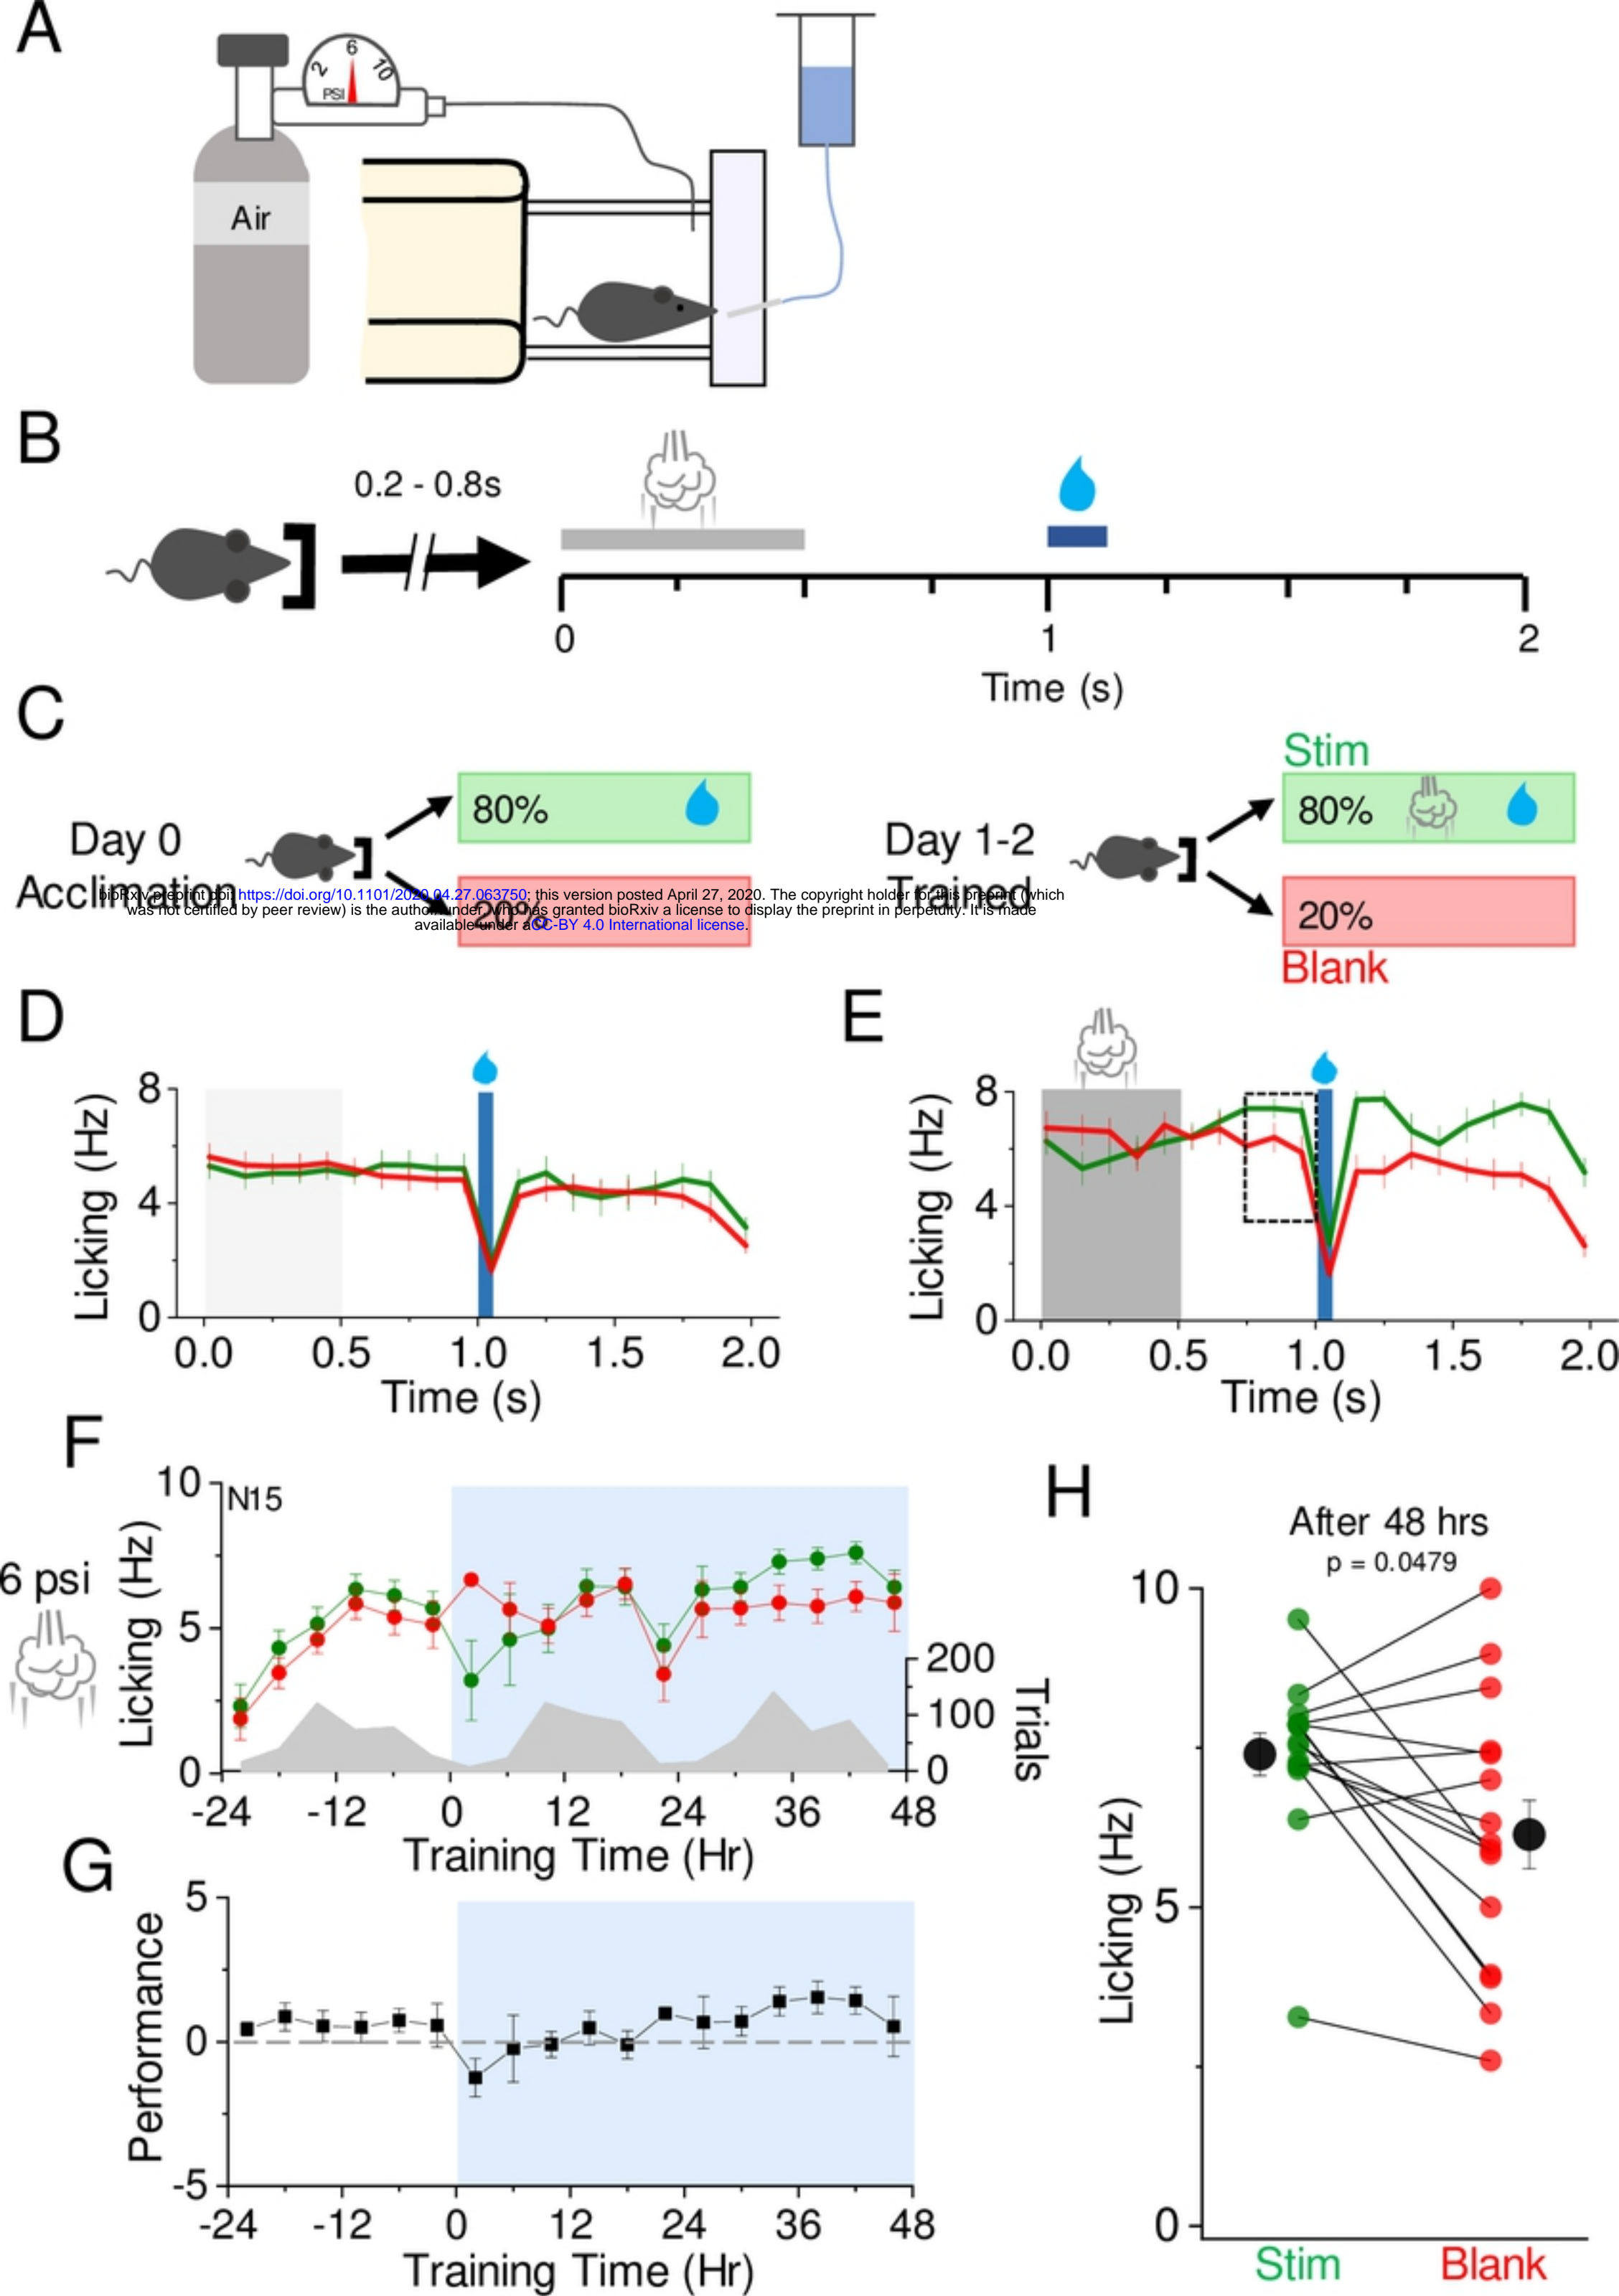

Figure

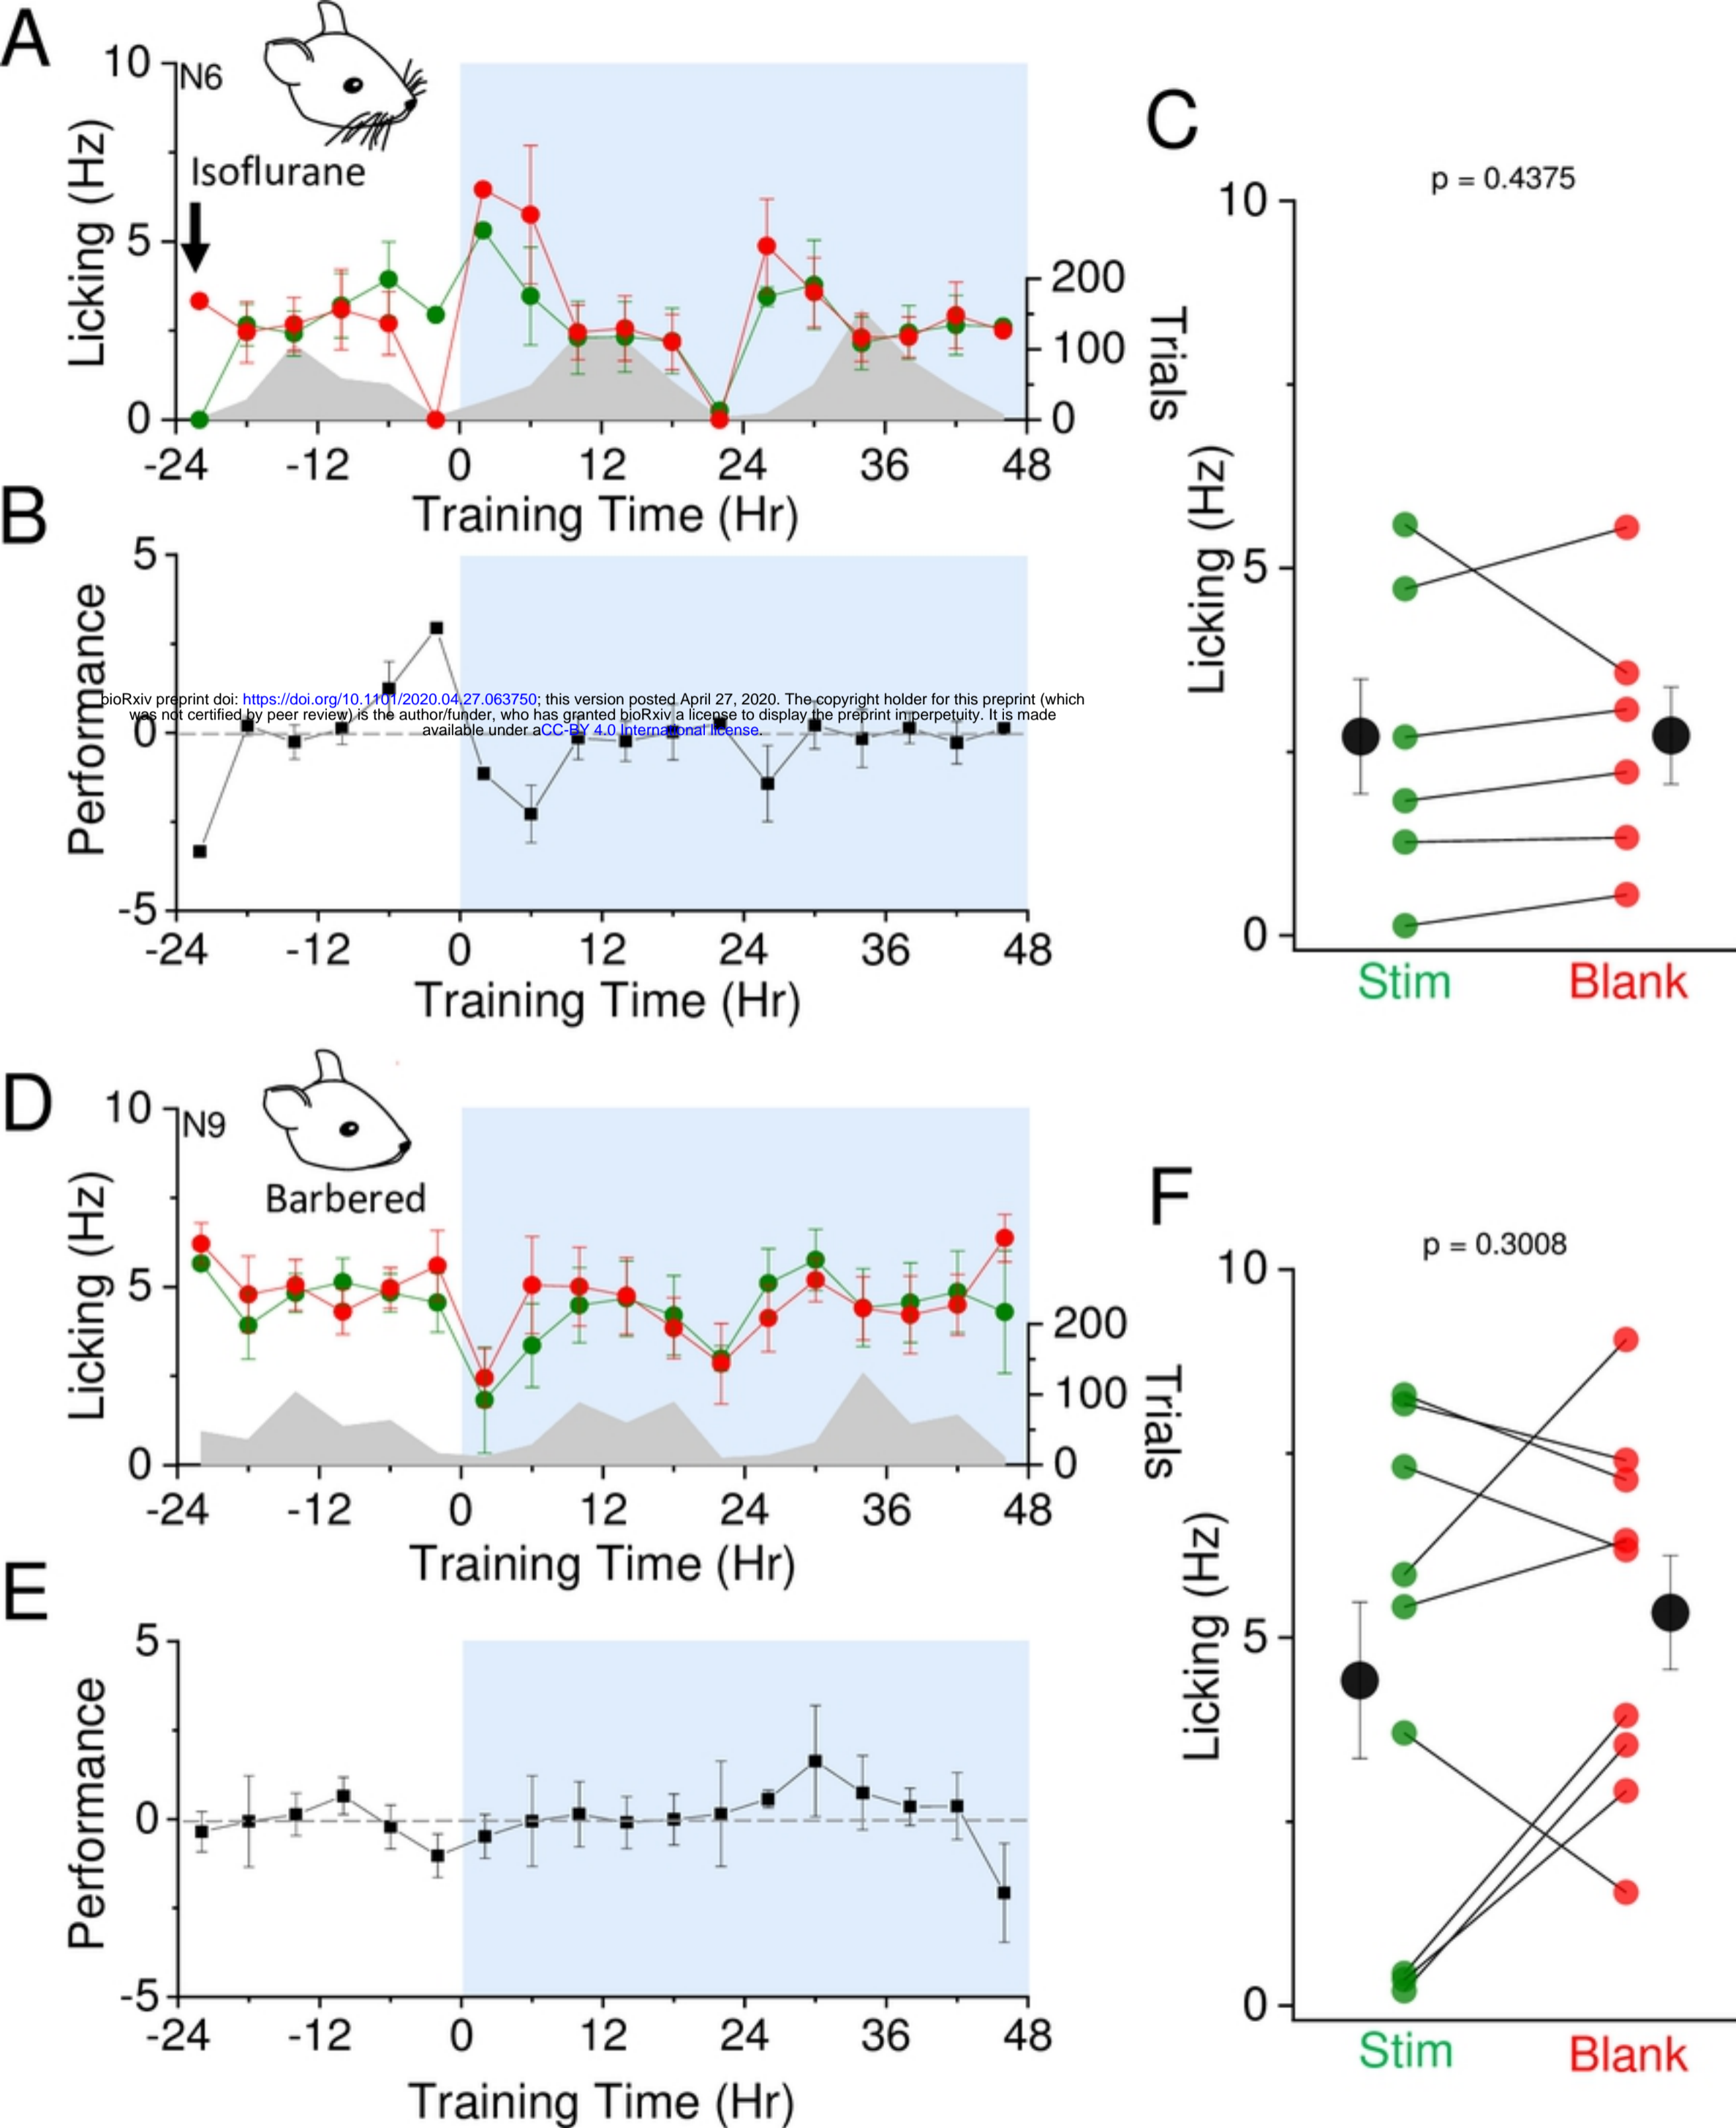

Figure

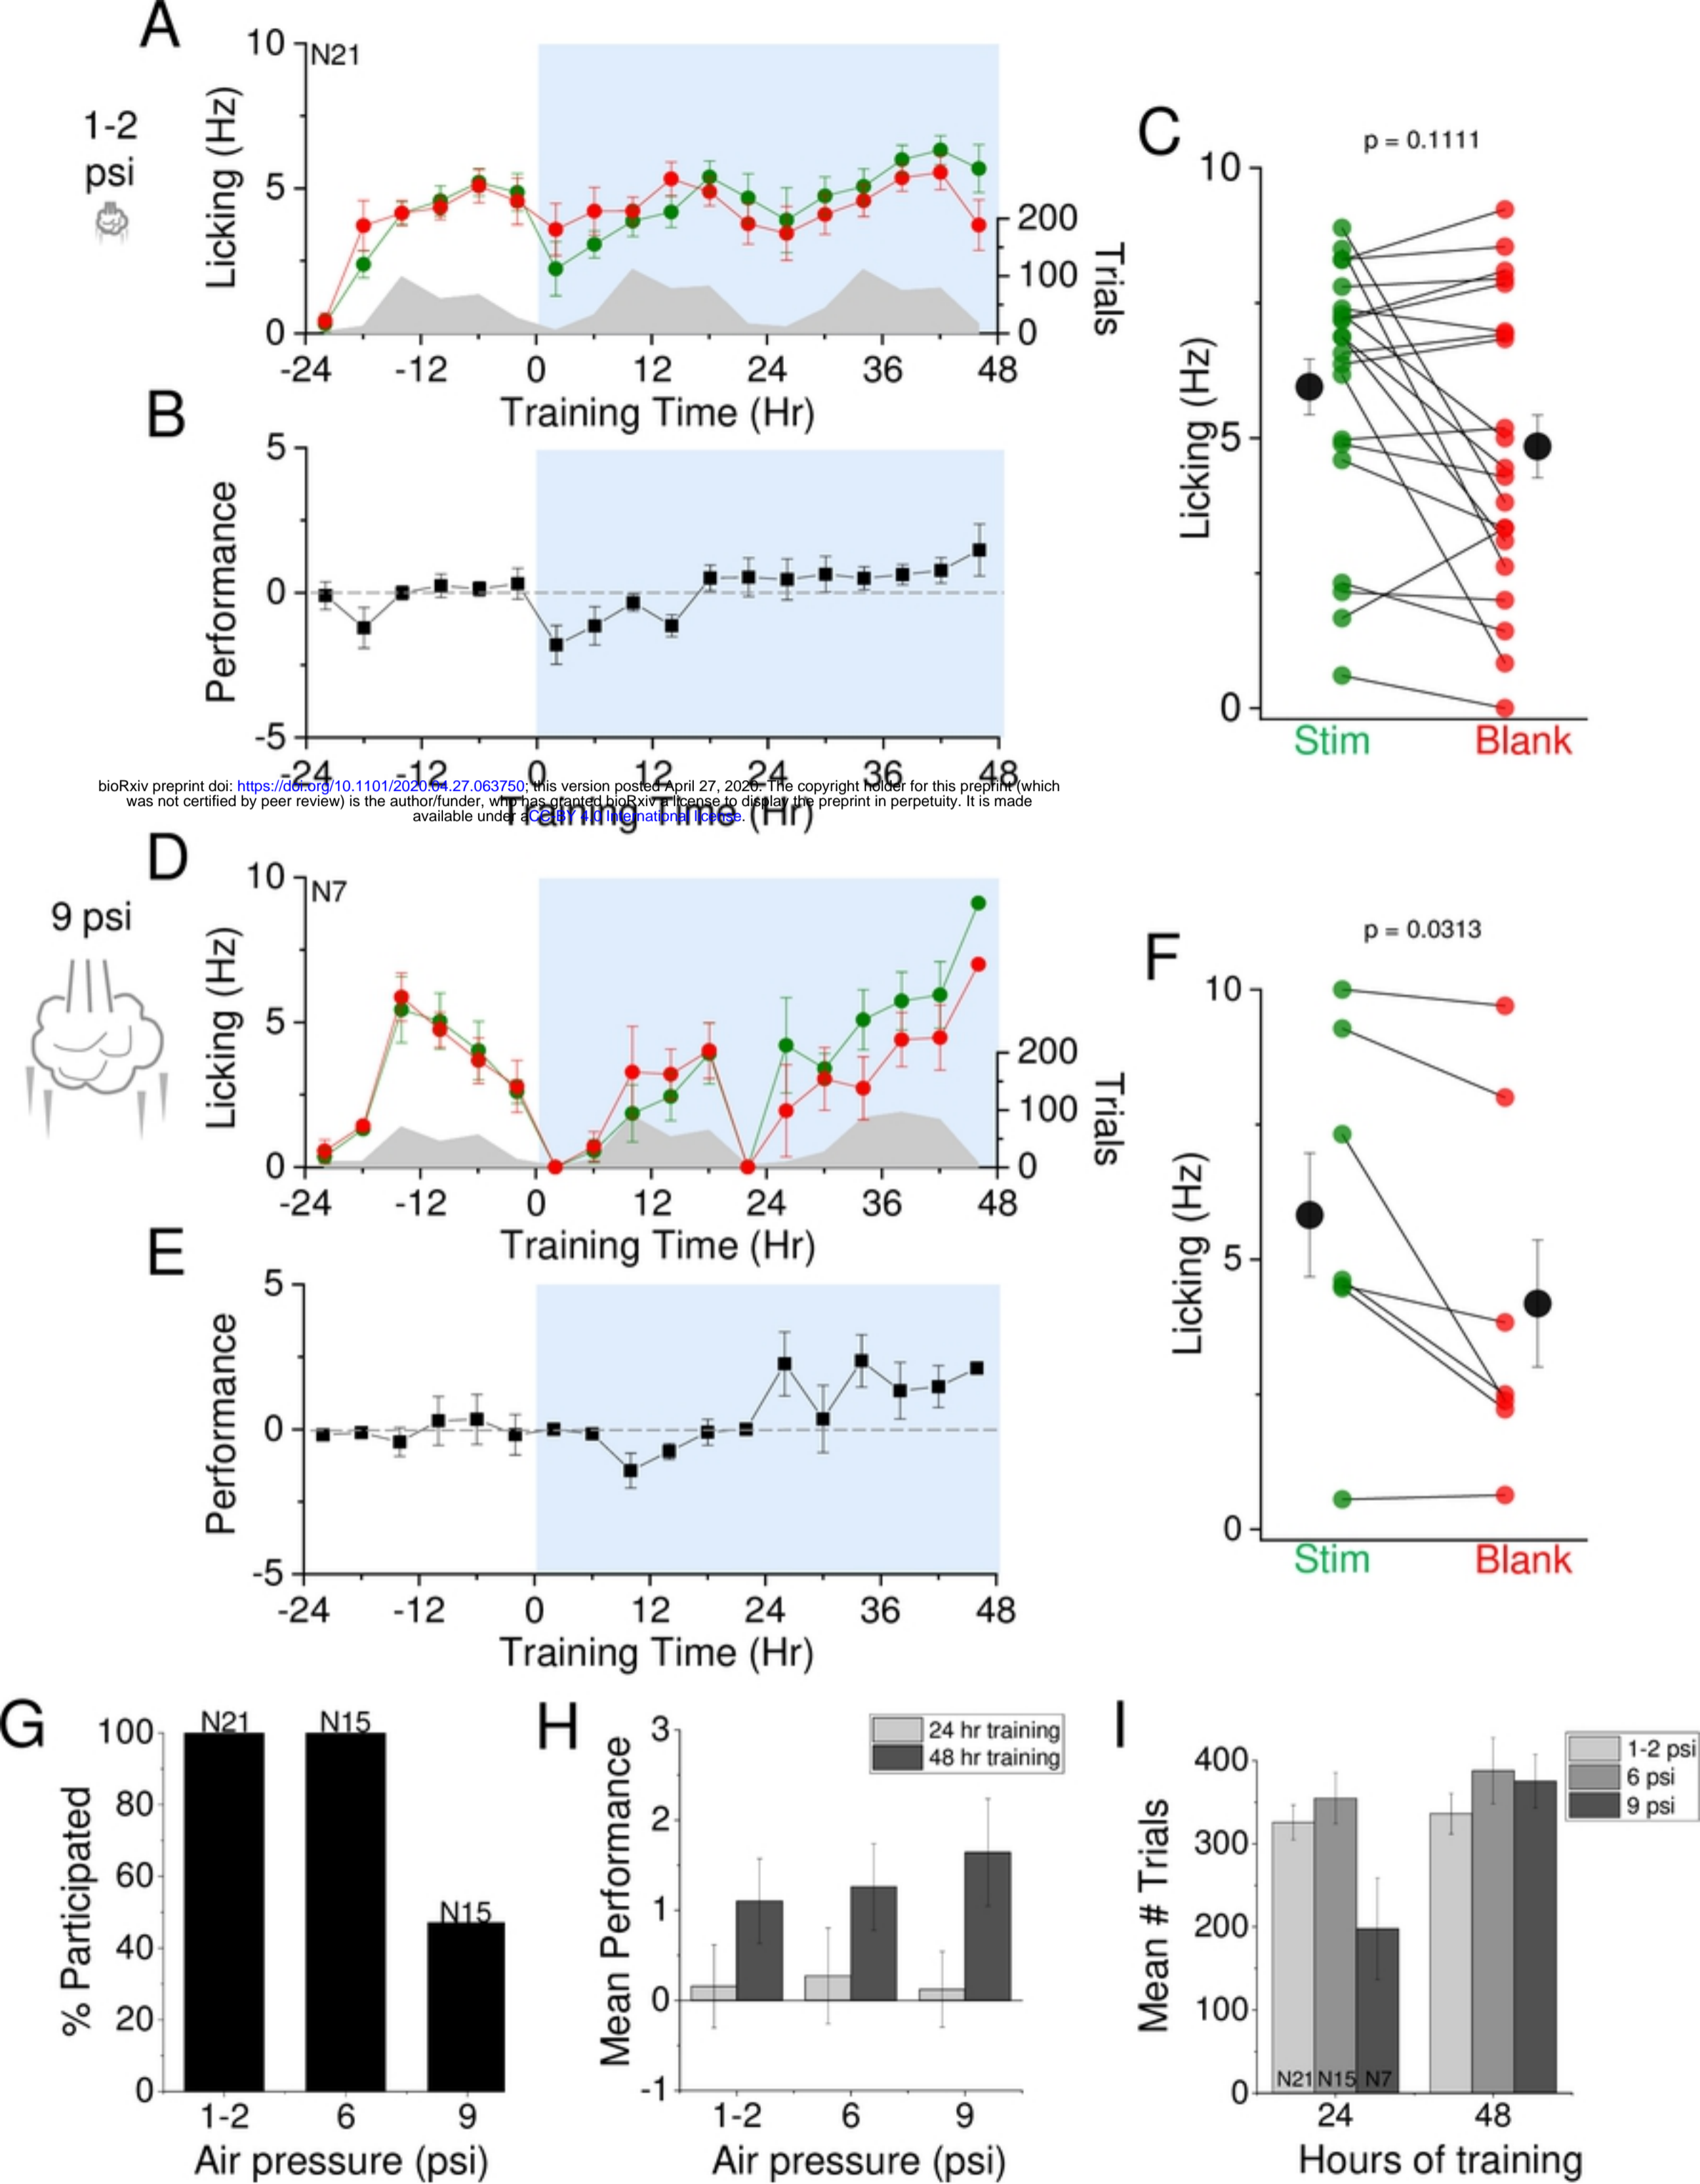

Figure

**A**

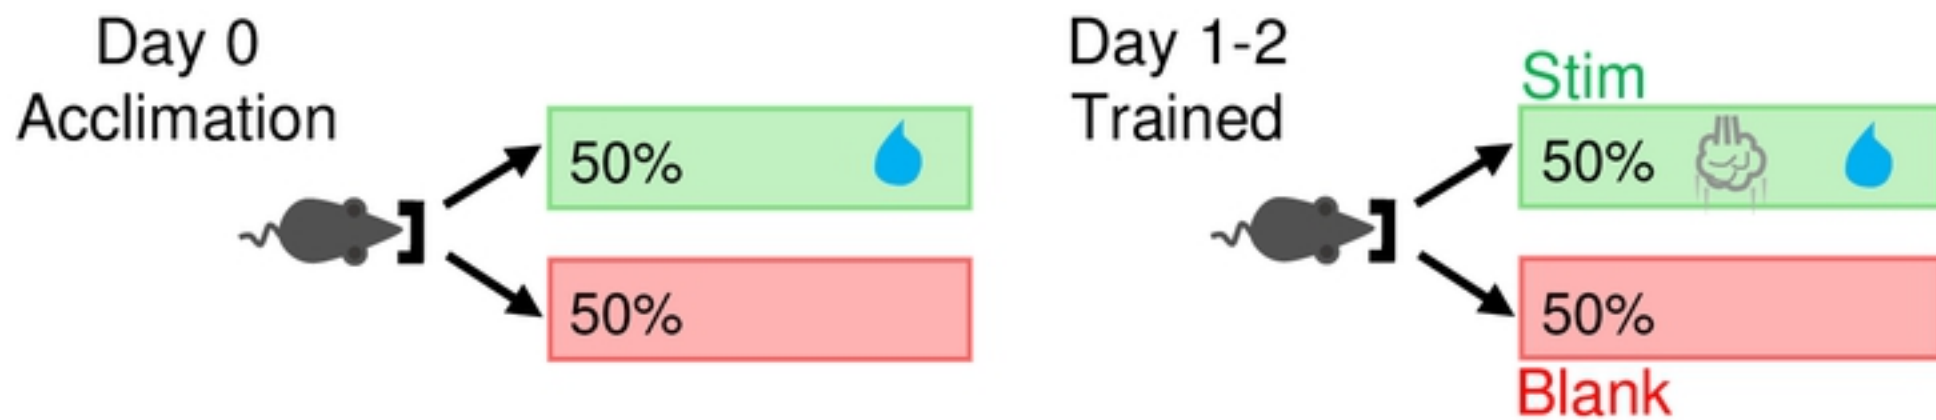

**B**

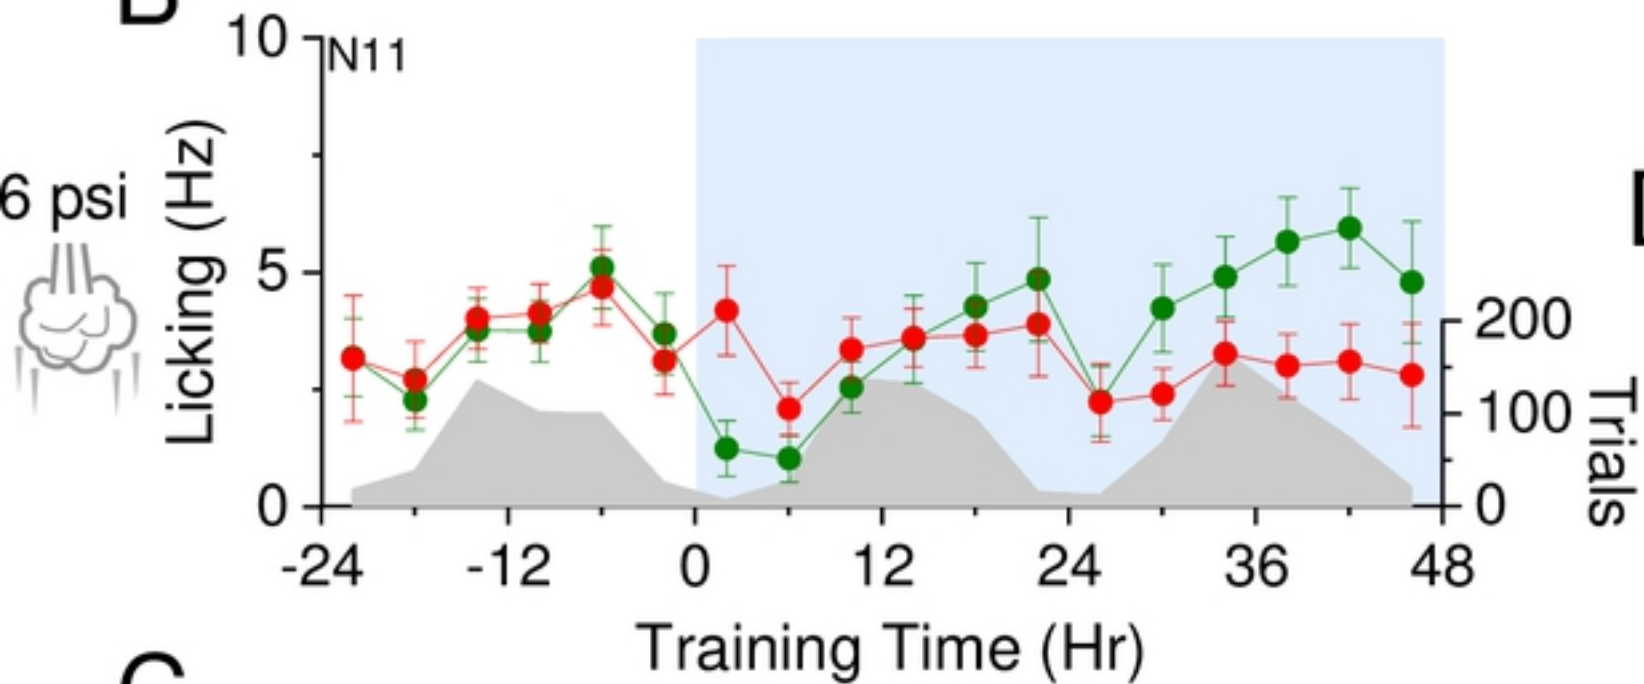

**C**

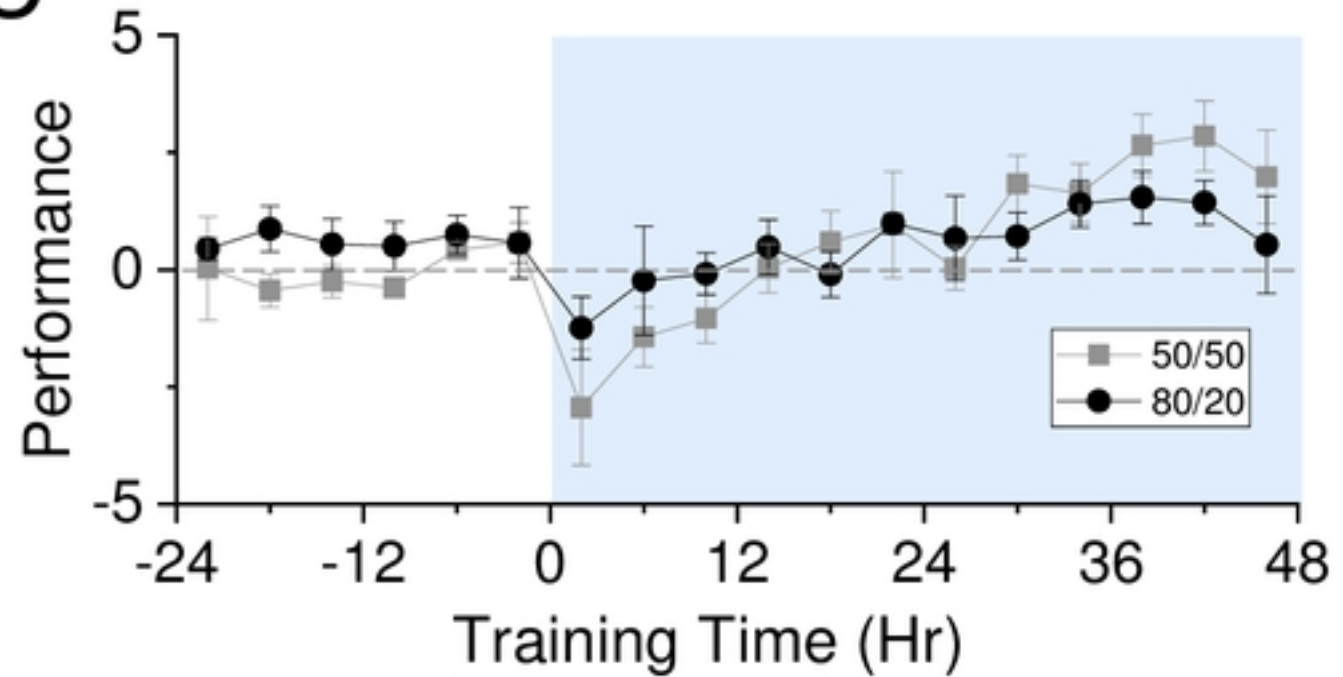

**D**

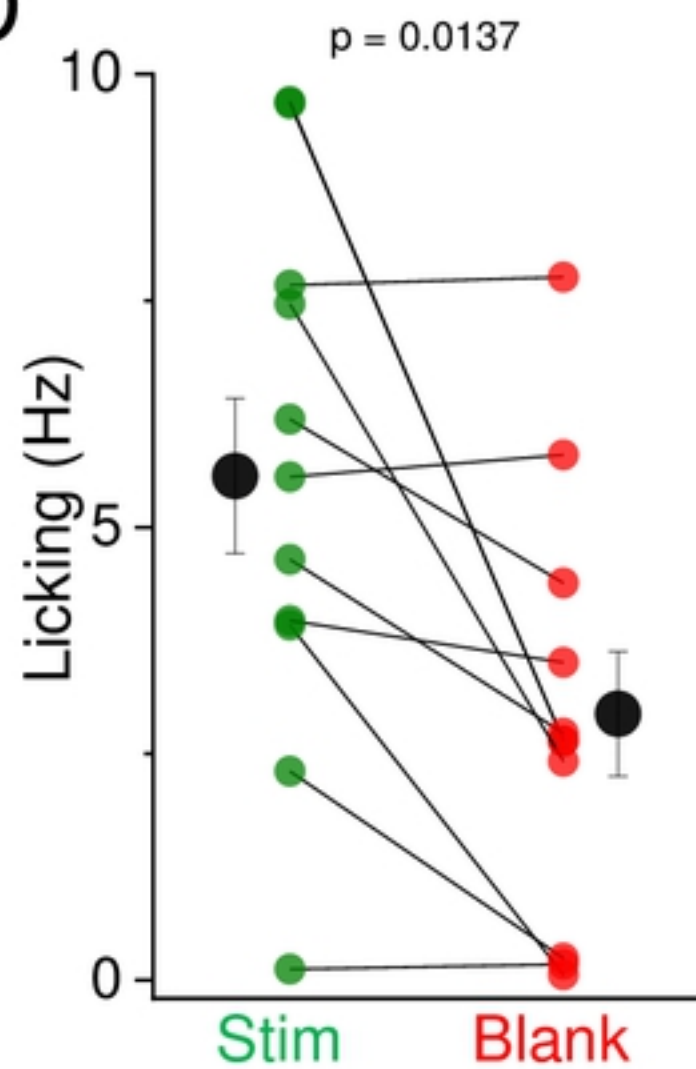

A

Day 0  
Acclimation

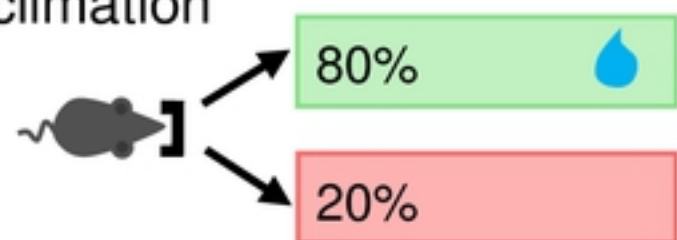

Day 1-2  
Trained

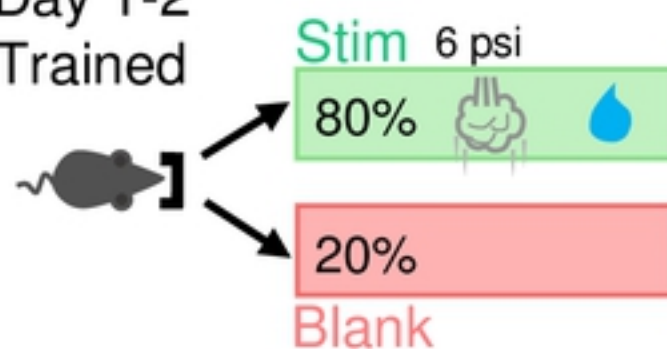

Day 3  
Trained

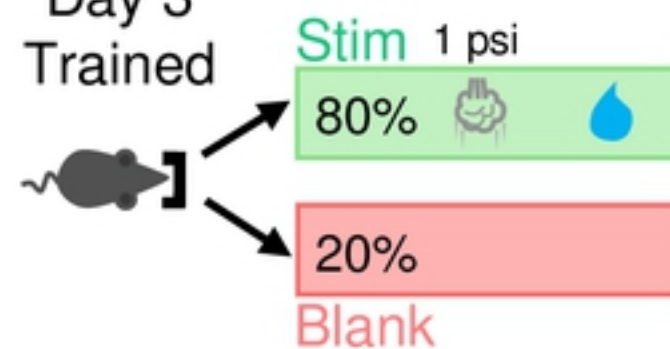

B

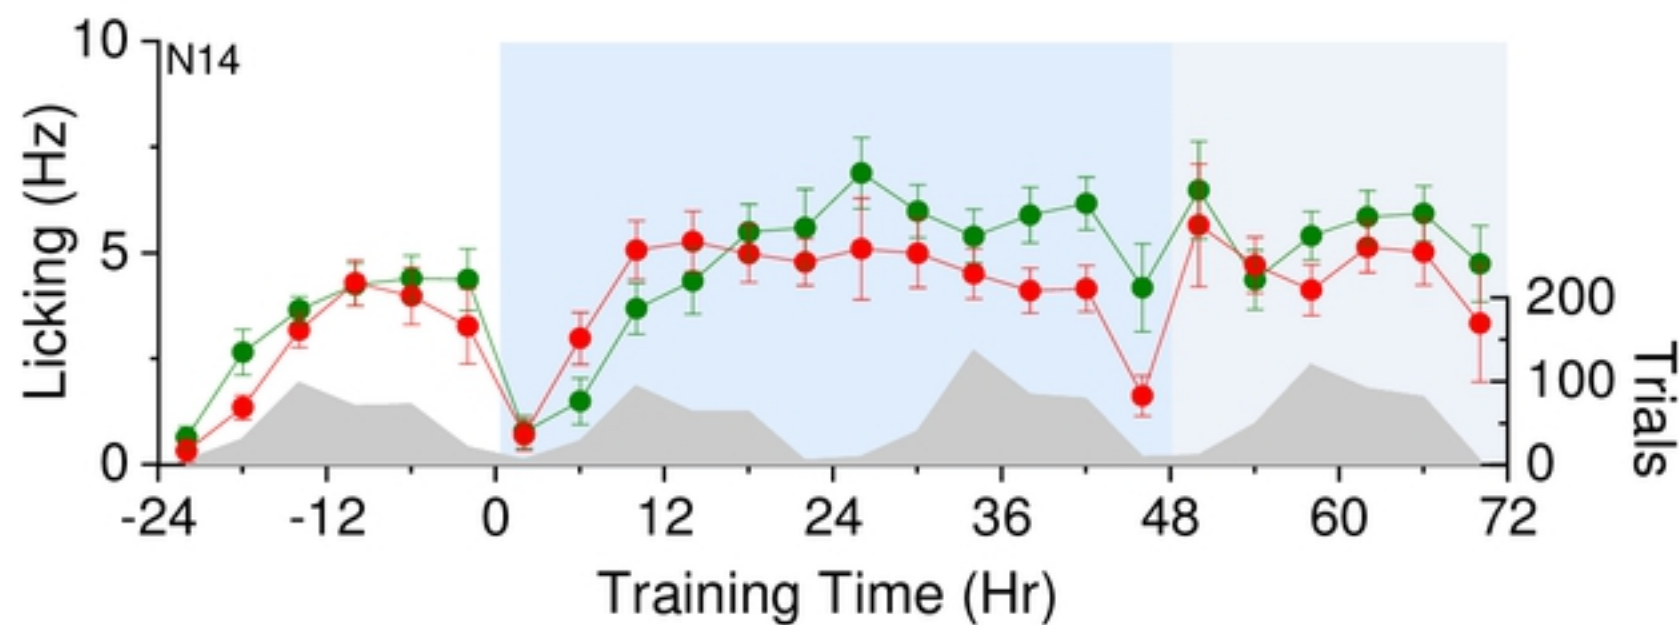

D

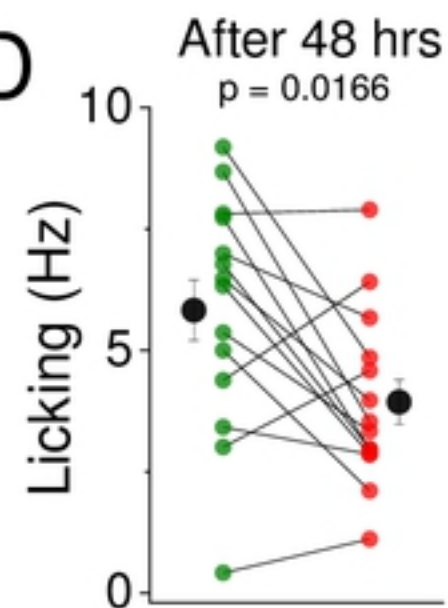

C

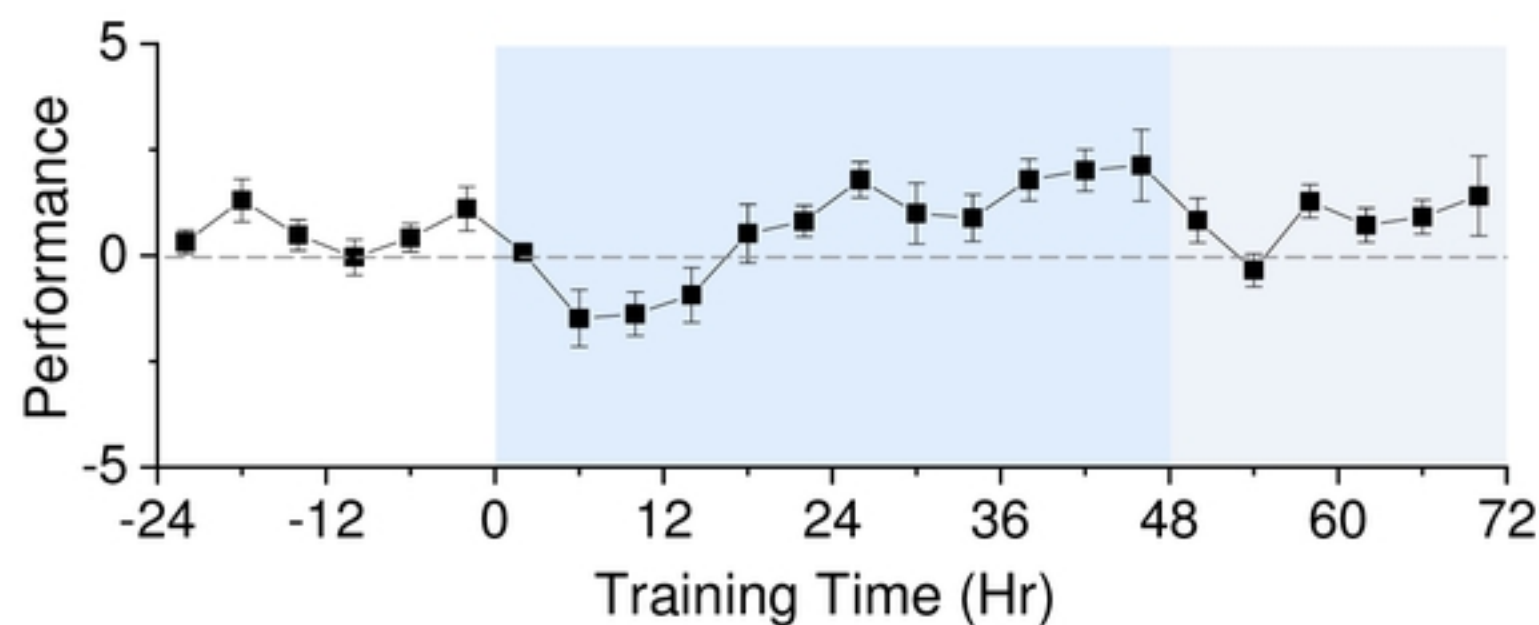

E

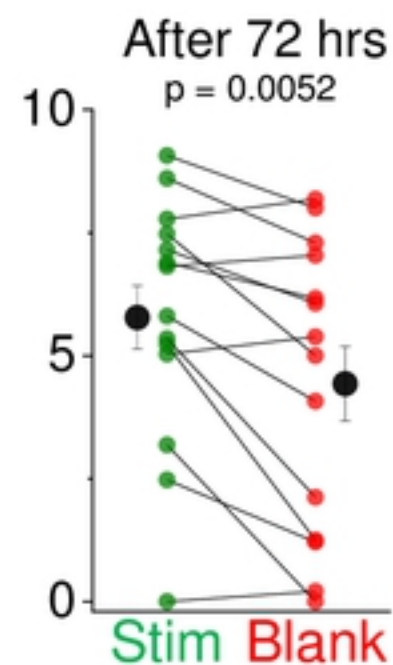

Figure

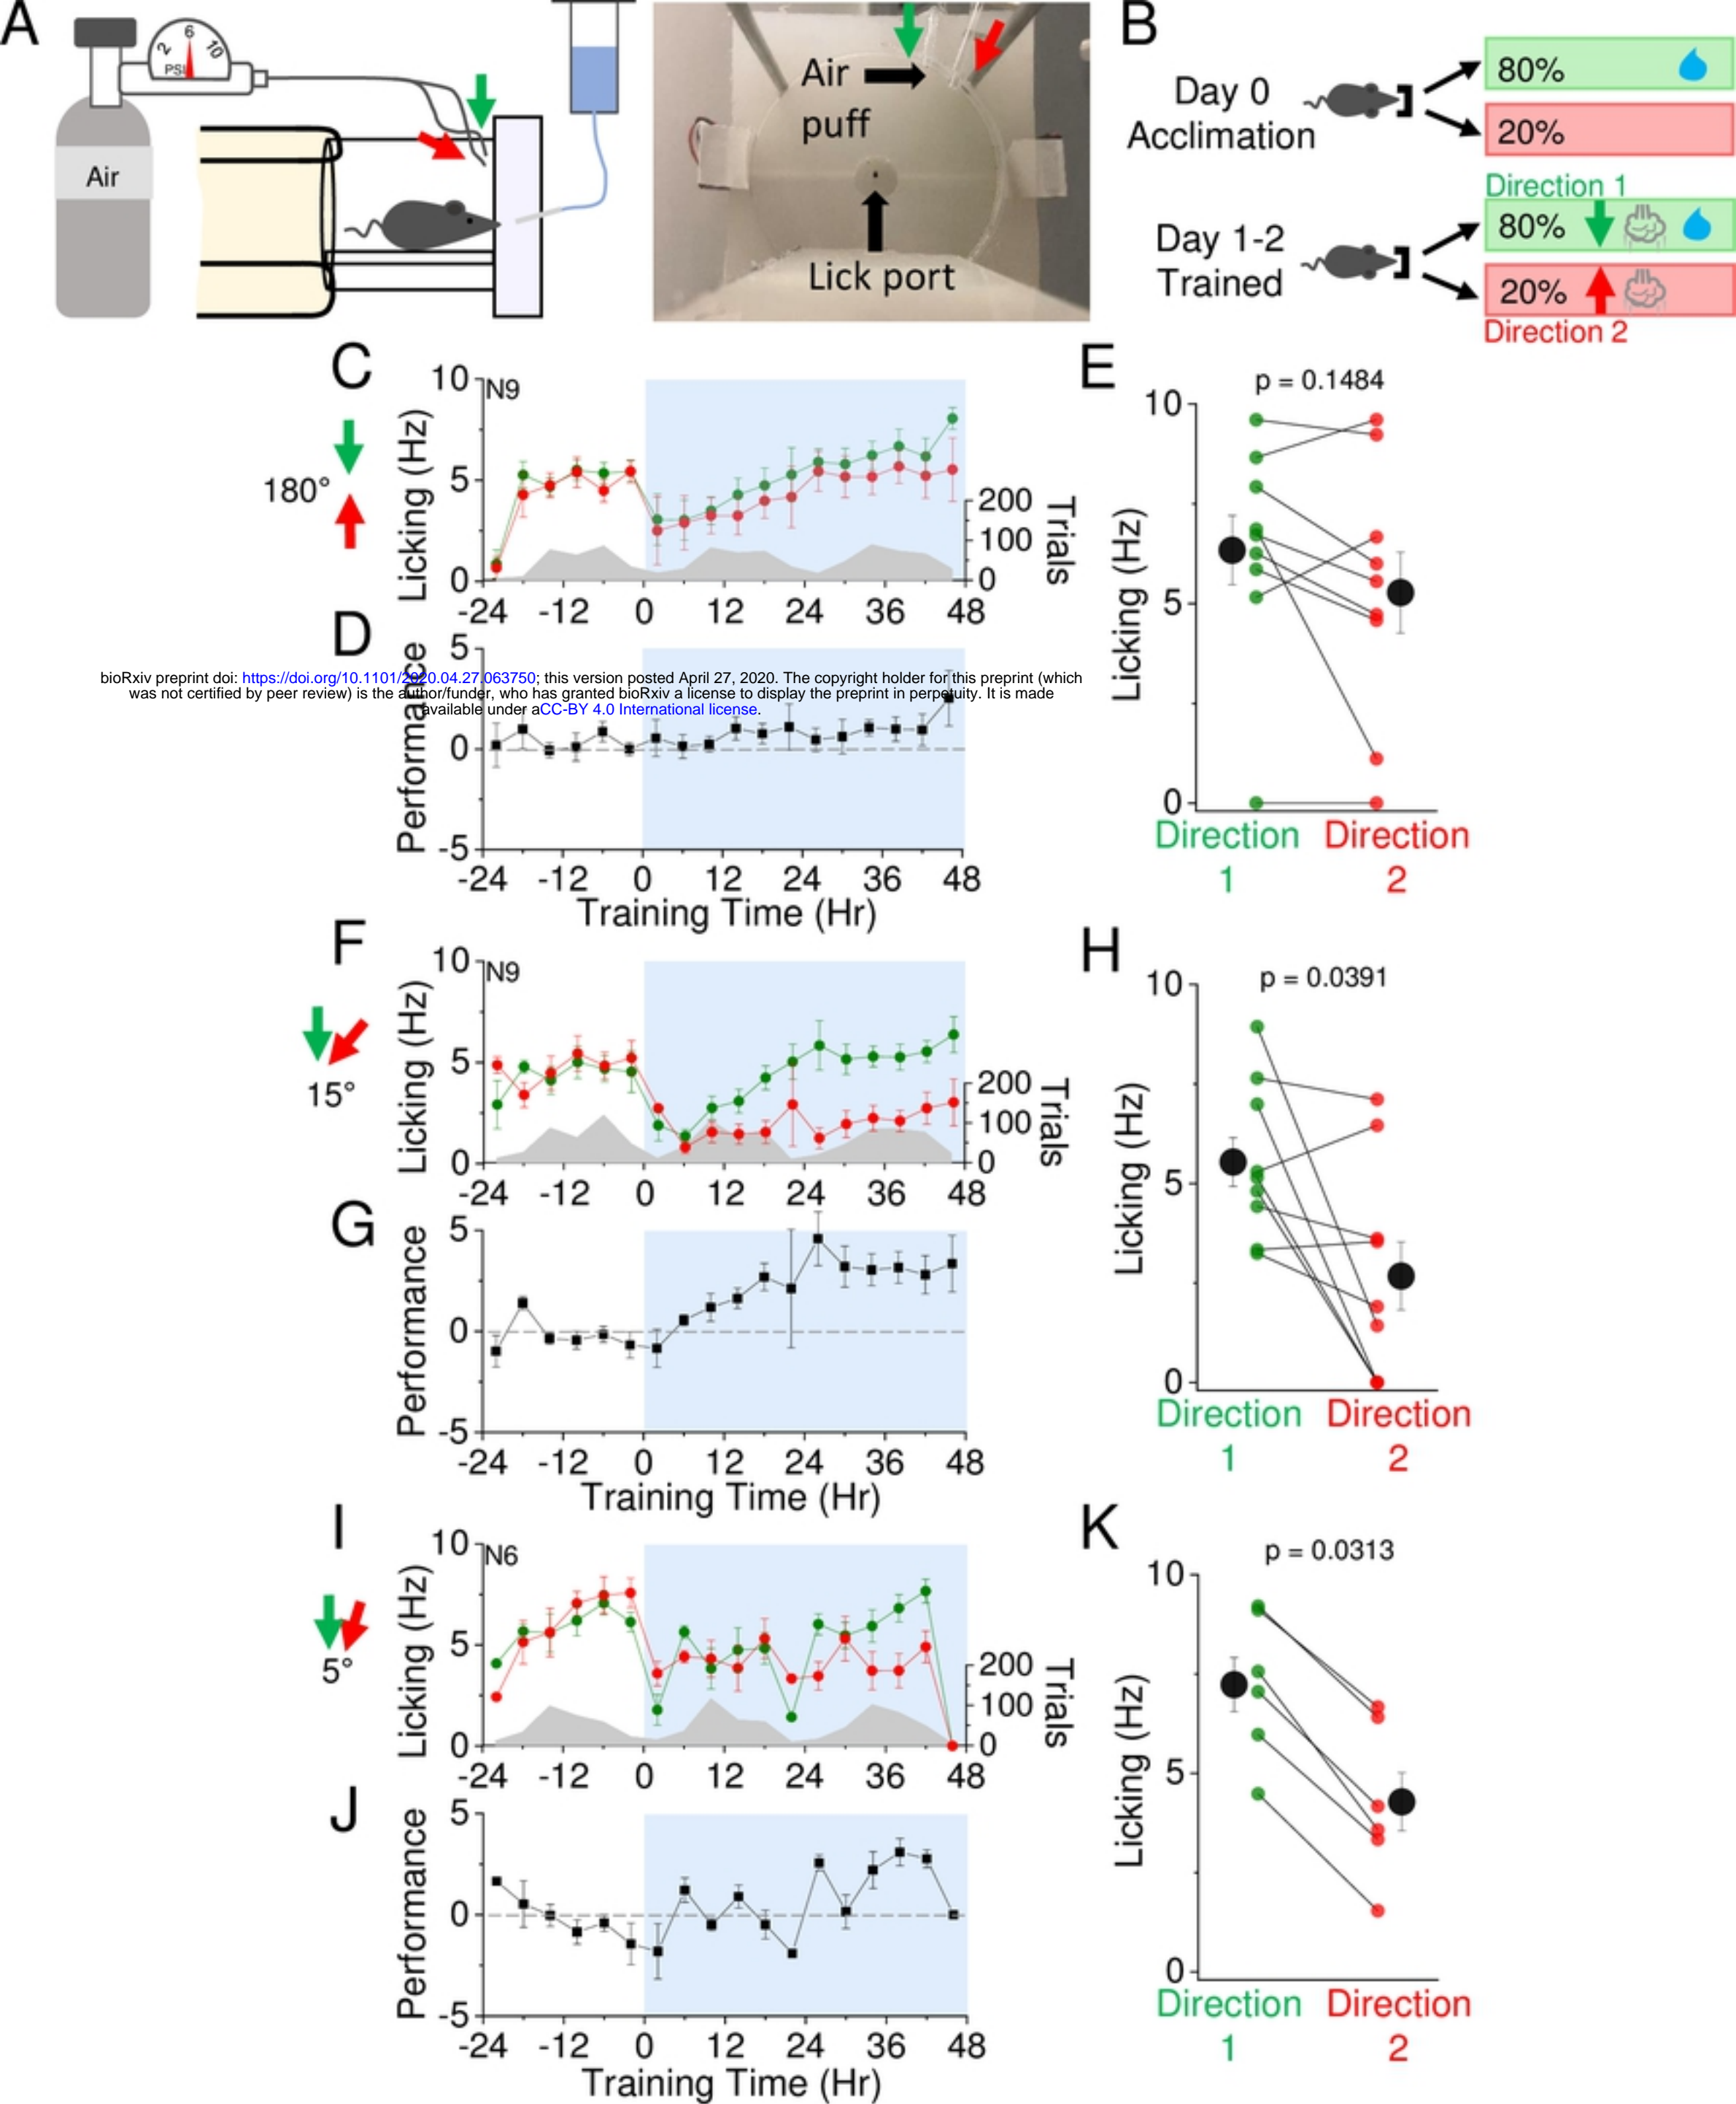

bioRxiv preprint doi: <https://doi.org/10.1101/2020.04.27.063750>; this version posted April 27, 2020. The copyright holder for this preprint (which was not certified by peer review) is the author/funder, who has granted bioRxiv a license to display the preprint in perpetuity. It is made available under aCC-BY 4.0 International license.

Figure

**A**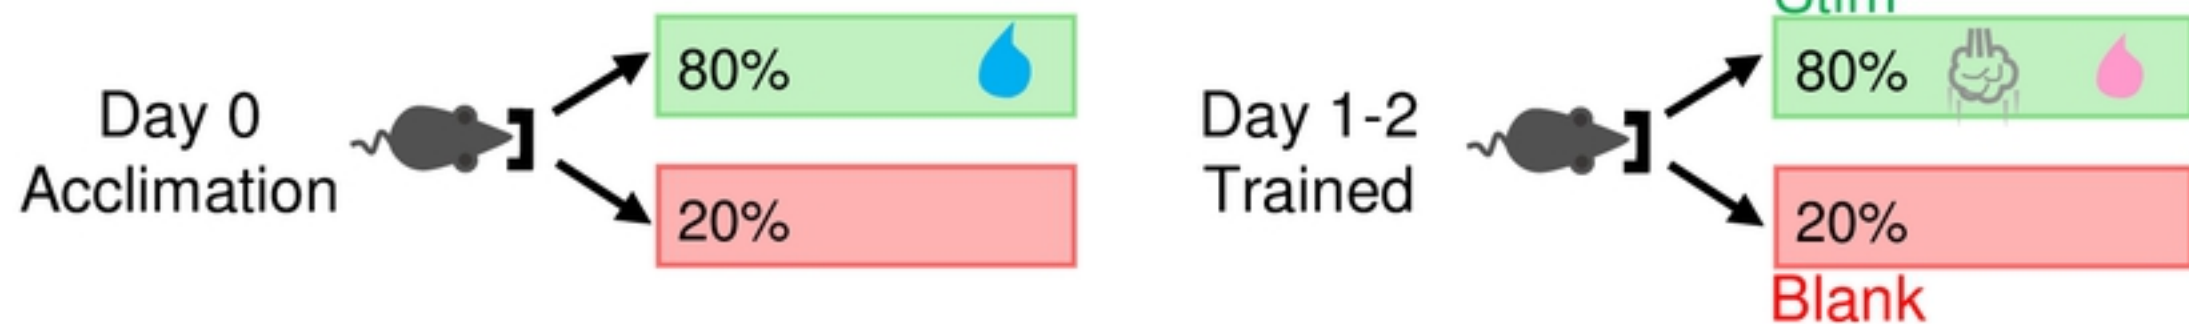**B**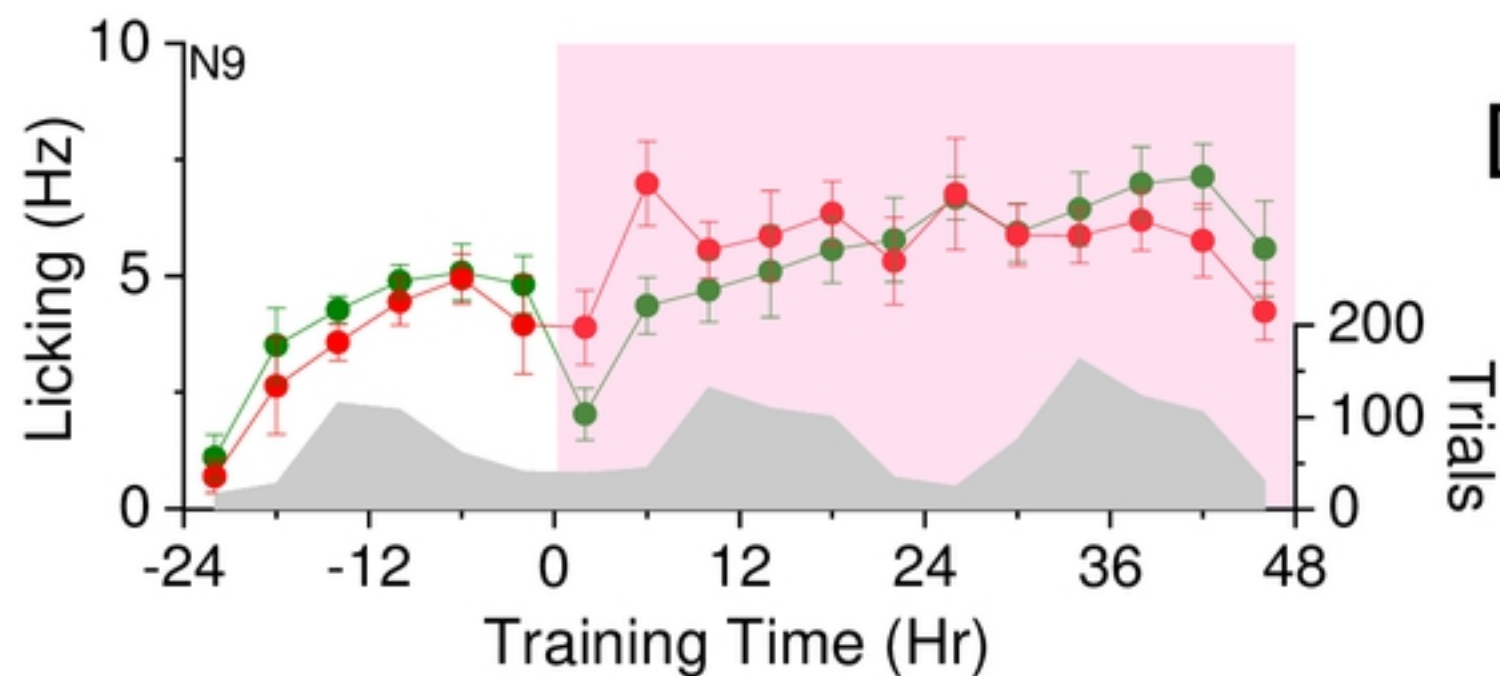**C**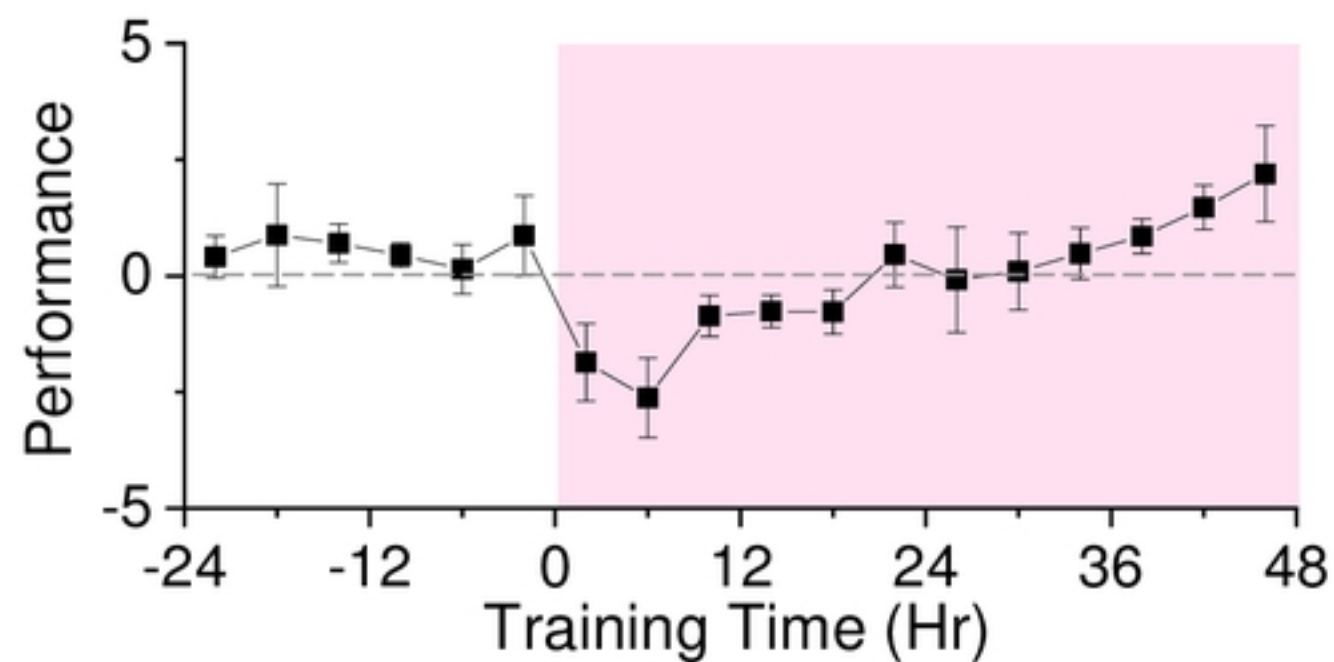**D**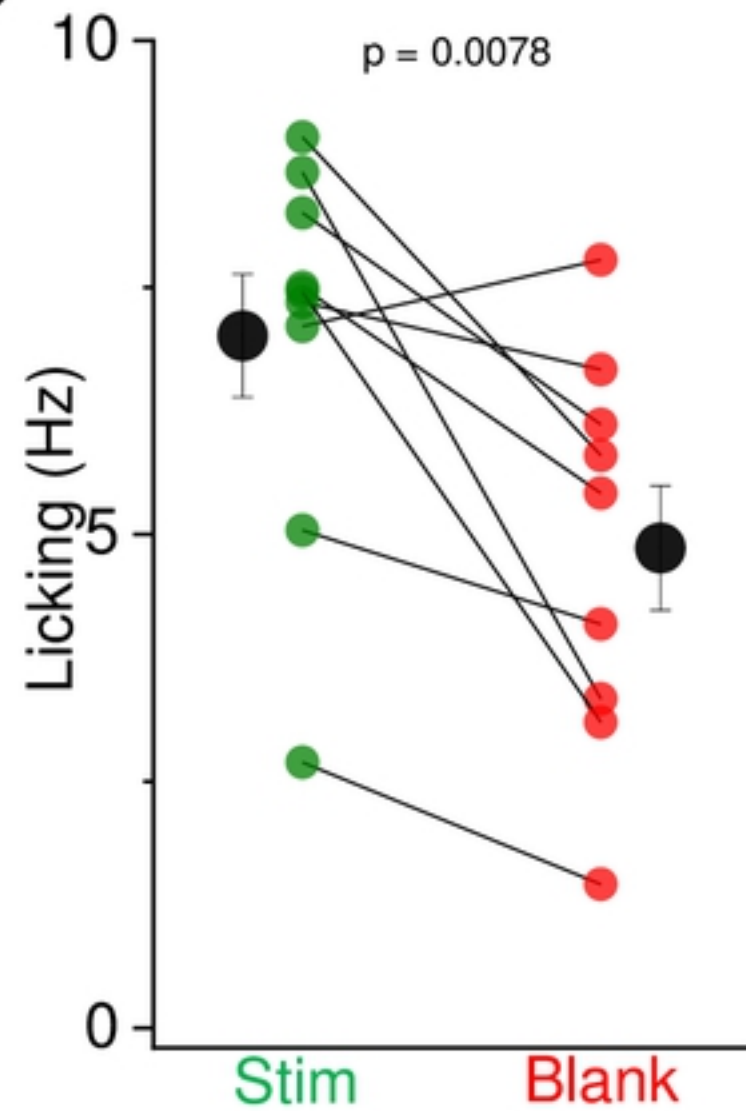

Figure
